# Supplementary material for: Aircraft observations of water-soluble dicarboxylic acids in the aerosols over China
Source: Copernicus journal article supplement (doi:10.5194/acp-2016-5), 2016-02-01
Supplement: Supplementary file [file acp-2016-5-AC1-supplement.pdf]

## **Responses to Reviewer's Comments to**

Zhang et al., "Aircraft observations of water-soluble dicarboxylic acids in the aerosols over China"

Anonymous Referee #1

The authors present a summary of airborne filter measurement data with a focus on dicarboxylic acids in aerosols over China. The topic of organic acid composition in aerosols is of interest to the atmospheric chemistry community since the organic fraction of particles is complex and uncertain, and requires improvements to be able to model their impacts better. The paper is written fairly well but requires some minor English editing (I point out a few suggested changes below for improving the language).

The tables and figures are appropriate. The title and abstract are also appropriate in terms of representing the contents of the manuscript.

The methods used are fine, and the results are informative and rich. The strength of the work includes the detection of so many organic acids that exceed the range of acids detected in some past studies relying on airborne measurements. The overall conclusions mostly repeat those in other studies though, which I hope the authors can address in their revisions. This study confirms that organic acids are generated

by secondary production mechanisms and that aqueous processing can be important, especially aloft. To strengthen the paper, I would suggest that the authors try to find something new in their data to push the state of understanding of organic acids forward as compared to repeating what has already been documented. The data generated are of high value as airborne diacid data are scarce, so it would be useful to have this work published. But before that happens, as noted above, it is requested that the authors narrow in better on what is novel in their dataset to highlight better in their text. This may be assisted by better consideration of what past work has shown and how this dataset can extend upon those past papers, some of which are highlighted below.

**Response:** we thank the reviewer for the nice summary of our paper and the positive comments. In the following responses, we will reply to each comment listed below individually.

Major Comments:

The authors should expand discussion on the potential influence of biomass burning on their measurements. When was biomass burning evident and how did this impact the organic acid data? Presumably the authors have reasonable tracers for biomass burning plumes.

**Response:** In the revised MS, we discussed the effects of biomass burning on diacids as follows. "Levoglucosan (1,6-Anhydro- $\beta$ -D-glucopyranose) has been used as a source tracer for biomass burning (Liu et al., 2013;Fu et al., 2012). Levoglucosan shows a significant correlation with oxalic acid and also secondary organic aerosol (SOA) tracers (Figure 5),

indicating that biomass burning is an important source of oxalic acid and SOA. It is interesting to note that levoglucosan was more abundant in spring than in summer. In addition, regression slope and correlation coefficient between oxalic acid and levoglucosan are higher in spring (i.e., slope: 2.7, r: 0.95) than in summer (i.e., slope: 1.7, r: 0.67), indicating that biomass-burning emissions play more important roles in spring than summer. Such higher values of slope of regression line and correlation coefficient were also found between levoglucosan and  $\alpha/\beta$ -pinene- and  $\beta$ -caryophyllene-oxidation products, emphasizing an importance of springtime biomass burning. However, isoprene-oxidation products have a higher correlation coefficient with levoglucosan in summer than in spring, implying that biomass burning in summer is an important contributor of isoprene-derived SOA.” Please see lines 338-350 in the revised MS.

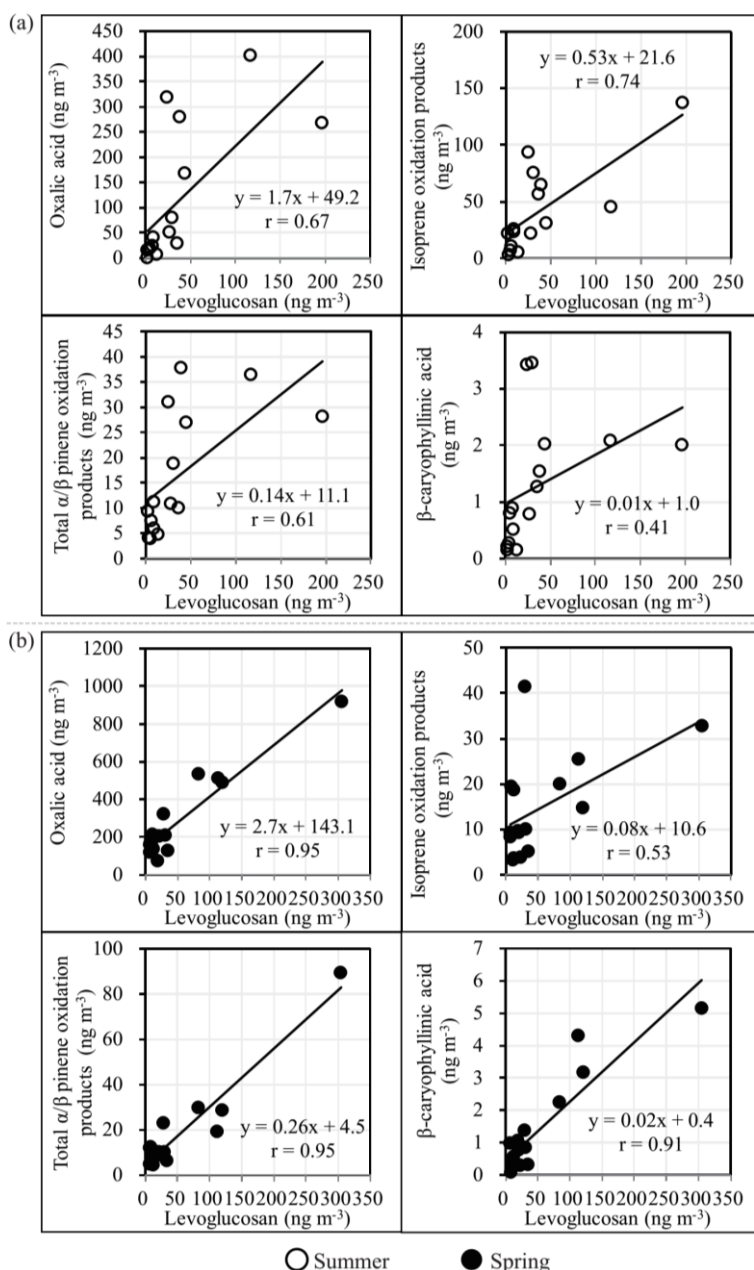

**Figure R1.** Linear relationship for the concentrations of levoglucosan with oxalic acid, isoprene SOA tracers,  $\alpha/\beta$ -pinene SOA tracers and  $\beta$ -caryophyllene SOA tracer from the aircraft measurements over China during (a) summer and (b) spring.

In various places in the manuscript the authors refer to Free Troposphere (e.g., Line 285). They should make it clear what data and criteria they used to distinguish between FT and the lower mixing layer.

**Response:** To clarify it, we change “at high altitudes within FT to “at high altitudes within the lower/middle troposphere”. Similarly, we made changes in other places. Such terms have also been used in previous studies (Fu et al., 2014; Wang et al., 2007).

Since denuders are not mentioned in the instrument description, the authors should comment on what impact the lack of using denuders have on the data. The authors should make note of what affect temperature effects would have on their data as during aircraft sampling there likely are differences in temperature between ambient air and their filters.

**Response:** In the revised MS, we added the following sentences; “The lack of using organic denuders may lead to a positive artifact (e.g., 10% of the organic carbon) by possible adsorption of gas-phase organic acids on the quartz filters (Cheng et al., 2009), but this will not affect our conclusions. Because air conditioning was not available in the aircraft, the ambient temperatures inside and outside the cabin should be similar, and thus potential adsorption of gaseous organic acids on quartz filter should be minimal.”

Specific Comments: Page 1, Line 4: change ‘organics’ to ‘organic’

**Response:** Done.

Page 2, Line 38-41: Diacids have also been measured in other areas such as deserts and this should be noted for the sake of completeness (example provided here): Sorooshian, A., et al. (2012). Hygroscopic and chemical properties of aerosols collected near a copper smelter: Implications for public and environmental health, Environ. Sci. Technol., 46, 9473-9480.

**Response:** We have referenced this paper.

Page 2, Line 41: ‘play an important role in. . .’

**Response:** Changed.

Page 3, Line 66-69: For completeness the authors should refer to the following other airborne studies: For ‘Coastal marine stratocumulus and cumulus clouds over USA’, add:

Wonaschuetz, A., et al. (2012). Aerosol and gas re-distribution by shallow cumulus clouds: an investigation using airborne measurements, *J. Geophys. Res.*, 117, D17202, doi:10.1029/2012JD018089.

Prabhakar, G., et al. (2014). Sources of nitrate in stratocumulus cloud water: Airborne measurements during the 2011 E-PEACE and 2013 NiCE studies, *Atmos. Environ.*, 97, 166-173, doi:10.1016/j.atmosenv.2014.08.019.

Measurements have been conducted over inland agricultural and urban areas in the western United States: Sorooshian, A., et al. (2015). Surface and airborne measurements of organosulfur and methanesulfonate over the western United States and coastal areas, *J. Geophys. Res.*, 120, doi:10.1002/2015JD023822.

**Response:** These papers are now cited.

Line 98: ‘for a series. . .’

**Response:** Changed.

Line 325-327: The discussion here can benefit from inclusion of past work showing how the relative amount of oxalate (versus total organic mass) increases with relative humidity based on airborne measurements [Sorooshian, A., et al. (2010). Constraining the contribution of organic acids and AMS m/z 44 to the organic aerosol budget: On the importance of meteorology, aerosol hygroscopicity, and region, *Geophys. Res. Lett.*, 37, L21807, doi:10.1029/2010GL044951] and how water-soluble organics have been shown to be enhanced relative to the surface when humid conditions aloft [Duong, H. T., et al. (2011). Water-soluble organic aerosol in the Los Angeles Basin and outflow regions: Airborne and ground measurements during the 2010 CalNex field campaign, *J. Geophys. Res.*, 116, D00V04, doi:10.1029/2011JD016674.].

**Response:** We acknowledge the reviewer’s comments. Although we did not measure relative humidity in these campaigns, the references were added in the revised MS.

Supplement Table 1: For altitude, the authors should include a plus/minus standard deviation since it seems unlikely that the aircraft was level for that long of a period for each sample.

**Response:** The accuracy in the altitude is roughly  $\pm 10\%$ . This point has been added in the revised MS.

Line 356: What do the authors mean by the word ‘control’? This seems like a very strong word that may not be warranted here. Are these diacids the majority of the OA mass and, if so, can this be shown in the manuscript in a revision?

**Response:** We change “control” to “have important impacts on”.

Table 2: The authors should make mention of the sample number involved with these correlation calculations somewhere in the table or caption.

**Response:** Samples numbers for calculations are included in the revised caption.

### **Anonymous Referee #2**

Received and published: 29 February 2016

The manuscript by Zhang et al studied distributions of organic compounds obtained by aircraft measurements in China and argued that contribution of aqueous-phase photochemistry to SOA formation is significant using various correlation analyses.

**Potentially this work will make an important contribution to SOA studies particularly in East Asia and be suitable for ACP readership.** But some of authors' arguments are confusing, misleading, and not clearly supported by evidence. Most of all, the organization is not effective. I highly recommend that authors should work on organization by bringing the LWC-oxalic acid analysis (currently in the end) to the front in Results and Discussion (Section 3) so that readers are clear about the main point of this manuscript is aqueous chemistry contribution to SOA. This will minimize confusions from paragraphs (Line 279-283, Line 283-285 and Line 291-299). Then, authors can discuss biogenic/anthropogenic influences on oxalic acid formation and aqueous chemistry. Provide biogenic/anthropogenic emission data if available. Provide NO<sub>x</sub> measurements, too for isoprene arguments. Take an advantage of referencing most recent papers. Below I provide comments. There are also numerous technical errors (e.g., grammatical errors, typos), which need to be corrected.

**Response:** We thank the reviewer for the nice summary of our paper and the positive comments. In the following we will respond to each comment listed below separately. In the revised MS, we moved the LWC-oxalic acid analysis (currently at the end) to the beginning of Results and Discussion section (Section 3). Further we included NO<sub>x</sub> data in the isoprene arguments, but we did not include biogenic/anthropogenic emission data because it is not available.

Line 38: Authors should clarify LMW. For example, is LWM less than 300? Or is a C5 diacid still LMW?

**Response:** In this paper, we measured diacids with carbon numbers from 2 to 11. To make it clearer, we remove "LMW" in the revised paper.

Line 41: LWM diacids -> Aerosols

**Response:** We changed the phrase to "As important components of aerosols, diacids ...".

Line 43: contribute from -> contribute to the wide range from

**Response:** Changed.

Line 56: is -> are

**Response:** Changed.

Line 62-64: This is a modeling study of cloud chemistry. There is no evidence yet from lab or field studies supporting this argument. There should be more discussions. Authors may discuss the mechanism of isoprene photooxidation focusing on partitioning of water soluble photooxidation products into the aqueous phase leading to oxalic acid formation.

**Response:** We rephrased the sentence as “Indeed, from a model study it has been proposed that photochemical oxidation of isoprene and subsequent partitioning of water soluble photooxidation products into the aqueous phase is a predominant formation pathway of oxalic acid (Myriokefalitakis et al., 2011).”

Line 74: I don't see a verb in the sentence.

**Response:** We rephrased “maybe” to “may be”.

Line 89: I am not clear about this. What are the examples of chemical constraints? And what more need to be considered?

**Response:** We changed “chemical constraints” to “chemical constraints (e.g., simultaneously measuring different types of organic aerosols such as diacids, ketoacids and  $\alpha$ -dicarbonyls and SOA tracer compounds)”.

Line 101: identified -> observed

**Response:** Changed.

Line 175-178: C5 and C6 diacids are the ozonolysis products in smog chamber studies. How does that support photooxidation (OH radical reaction or photolysis) of anthropogenic precursors? If cloud (photo)chemistry was involved, authors need to state that. Besides, authors should provide evidence (or reference) of higher oxidation capacity in the areas (or polluted areas) during the summer than winter.

**Response:** Although C5 and C6 diacids are the ozonolysis products in smog chamber studies, Pavuluri et al. (2015) recently proposed that C5 and C6 species are produced by photochemical processing of aqueous aerosols based on a laboratory experiment. In addition, C5 and C6 diacids have been used good tracers for anthropogenic sources in many studies (Kawamura and Bikkina, 2016). Using a global chemical transport model, the distributions of tropospheric OH over China show that tropospheric OH are higher in summer than in spring and winter (Shen and Wang, 2012; Su et al., 2012). These points have been added in the revised MS.

Line 188-200: OH reactions of water soluble organic compounds in the aqueous phase clearly produce malonic and succinic acid (Tan et al., EST, 2009). Authors should include this in their discussion. How does aqueous photooxidation affect C3/C4?

**Response:** In the revised MS, we added the following discussion, which reads as “In addition, C3 and C4 diacids can be formed by OH reactions of water soluble organic compounds such as glyoxal (Tan et al., 2009) and C3/C4 ratios gradually decrease with the reaction time (Pavuluri et al., 2015). The lower C3/C4 ratios in summer indicate that diacid aerosols are relatively fresh but will be subjected to more atmospheric aging than in other seasons due to increased OH concentrations and solar radiation.” These points are added in the revised version.

Line 219-222: It seems this statement contradicts the previous statement (Line 184-186).

**Response:** This statement means that produced SOA is mostly fresh without intensive aging as evidenced by high M/F and low C3/C4 ratios. If SOA is intensively aged, M and C4 will be transformed to F or degraded to C3, respectively, but it is not observed in our study.

Line 221: Does “the low troposphere” means the ground level?

**Response:** We rephrased “the low troposphere” to “the lower/middle troposphere”, to be consistent with previous terms used in the same campaign (Fu et al., 2014; Wang et al., 2007).

Line 232-233: Again, provide evidence or reference.

**Response:** References are added (Shen and Wang, 2012; Su et al., 2012).

Line 245: I would note that C2 is oxalic acid. Let readers know that C<sub>n</sub> is n-numbered carbon diacid somewhere in the text.

**Response:** Following the comment, we rephrased the sentence.

Line 248-250: Remove wC2 if you mean HCO-COOH is glyoxylic acid, which is an oxidation product of pyruvic acid, glyoxal, and methylglyoxal. Also reference Lim et al., ACP 2013, which show a full mechanism for aqueous OH reactions.

**Response:** We revised the MS by taking the comment.

Line 252-255: I doubt this is true. Oxalic acid is the most dominant product for glyoxal with the high yield (Tan et al. EST, 2009; Lim et al., ACP, 2010). But it is not for methylglyoxal. So, the given correlation analysis cannot tell whether C2 is biogenic.

**Response:** Yes, we agree with the comment. We change the sentences as “We found that the correlation coefficient between Gly and C<sub>2</sub> is higher than that for MeGly and C<sub>2</sub> in winter and spring samples, being consistent with the fact that oxalic acid is the dominant product of glyoxal with the high yield but not for methylglyoxal (Tan et al., 2009; Lim et al., 2010).”

Line 256-259: The same goes here. Is there any evidence support that winter is more anthropogenically influenced (e.g., seasonal emission inventory)?

**Response:** We do not have emission inventory data, but a recent study reveals that air pollutants such as SO<sub>2</sub>, NO<sub>2</sub>, PM<sub>2.5</sub> and PM<sub>10</sub> are higher in winter than in summer and these pollutants are mostly from anthropogenic emissions (Zhang and Cao, 2015). This is now included.

Line 267-268: 2-methyltetrols are also isoprene SOA tracers. This means oxalic acid correlated with some of isoprene SOA tracers, not all.

**Response:** we rephrased the sentence as “Oxalic acid shows a strong positive correlation with *two specific* isoprene-derived SOA tracers such as 2-methylglyceric acid (2-MGA) and C<sub>5</sub>-alkene triols (cis-2-methyl-1,3,4-trihydroxy-1-butene, 3-methyl-2,3,4-trihydroxy-1-butene plus trans-2-methyl-1,3,4-trihydroxy-1-butene).”

Line 269: Are you sure there are diepoxy derivatives from isoprene? None of Paulot et al. Science, 2009 and Surratt et al. PNAS, 2010 reports that. If it is a typo, then change it to epoxy derivatives.

**Response:** It should be epoxy derivatives. We rephrased it as epoxy derivatives.

Line 270: further oxidation -> further gas-phase oxidation. There is no aqueous chemistry involved here.

**Response:** Corrected.

Line 272-274: NO<sub>x</sub> is critical in isoprene-OH reactions. In the presence of NO<sub>x</sub>, methacrolein and MVK form. In the absence of NO<sub>x</sub>, ISOPOOH forms and further ISOPOOH reactions produce IEPOX. To support your conclusion, you should provide NO<sub>x</sub> measurements.

**Response:** Overall, tropospheric atmosphere over China was characterized with relative high NO<sub>x</sub> concentrations. We rephrased the sentence as “Such a good correlation between 2-MGA and oxalic acid could demonstrate that oxalic acid has a very close link with the higher-generation products of isoprene in the presence of relatively high NO<sub>x</sub> (i.e., NO<sub>x</sub> averaged to 6.6±4.0 ppbv in summer and 3.9±3.3 ppbv), which could serve as precursors of oxalic acid over China.”

Line 279-283: This statement is confusing. Are you saying oxalic acid is formed via gas-phase oxidation without aqueous reactions and lifted up to FT? But, there is no evidence of oxalic acid formation from gas-phase oxidation of isoprene or monoterpene. Besides, recent lab and field studies suggest that IEPOX contributes to SOA via aqueous chemistry (Nguyen et al. ACP, 2010; Budisulistiorini et al., ACP 2015; Pye et al., EST, 2013).

**Response:** We modified the sentence as “Based on the consistent good correlations of oxalic acid with SOA tracers derived from isoprene, monoterpene and β-caryophyllene, we propose



that a large fraction of oxalic acid in the lower/middle troposphere over China is of secondary origin, i.e., via aqueous chemistry.”

Line 281: What is the boundary layer height? Is this 2 km, the lower FT?

**Response:** The boundary layer height was not measured. We rephrased “the boundary layer height” to “the lower/middle troposphere” to be consistent with terms used in this and previous study.

Line 283-285: It is difficult to conclude like this unless authors provide compelling evidence of aqueous chemistry leading to oxalic acid.

**Response:** Based on the consistent good correlations of oxalic acid with specific SOA tracers in aerosols, we could propose that oxalic acid is of secondary origin. We rephrased “should” to “may”.

Line 291-299: These statements are also confusing. Why should oxalic acid be considered for SOA? Note that oxalic acid itself is not SOA due to high vapor pressure. I would agree if you argue that oxalic acid is evidence of aqueous chemistry. Then, you need to discuss how water soluble compounds formed from biogenic and anthropogenic sources; how they partition into wet aerosols or cloud waters; and how OH radicals formed and initiated aqueous-phase photooxidation.

**Response:** Although oxalic acid has relatively high vapor pressure, it has been observed as the most abundant individual organic compounds in aerosols (Kawamura and Bikkina, 2016). Our study together with many previous studies have revealed that oxalic acid is mostly from aqueous-phase production and is therefore of secondary origin (Myriokefalitakis et al., 2011). In addition, oxalic acid may partly exist as hydrated and/or salt forms in aerosols. Therefore, it is important to consider oxalic acid or oxalate as important SOA tracers. Please see lines 332-337 in the revised MS.

Besides, you mentioned C5 and C6 are from anthropogenic sources. But this chemistry is initiated by ozone and not related to aqueous chemistry. How is including this chemistry likely to reduce the discrepancy between model predictions and measurements of OA?

**Response:** We removed the following sentences “~~Inclusion of oxalic acid (and also other LWM diacids) as major products from atmospheric oxidation of biogenic (and also anthropogenic) VOCs may partially reduce the discrepancy between modeled and observed tropospheric OA during the ACE-Asia campaign, although further studies are still required to investigate other SOA compounds (e.g., oligomeric components) produced from anthropogenic and biogenic VOCs in the reactions to fully understand the associated formation pathway and mechanism~~”.

Line 308: Do you mean higher altitude at low FT?

**Response:** We rephrased it as “in the upper troposphere (~2 km).”

Line 314: Specify “other species.” Can they also provide evidence of aqueous chemistry like oxalic acid.

**Response:** This sentence has been removed in the revised MS.

### References:

Cheng, Y., He, K. B., Duan, F. K., Zheng, M., Ma, Y. L., and Tan, J. H.: Positive sampling artifact of carbonaceous aerosols and its influence on the thermal-optical split of OC/EC, *Atmos. Chem. Phys.*, 9, 7243-7256, 2009.

Fu, P., Kawamura, K., Chen, J., Li, J., Sun, Y., Liu, Y., Tachibana, E., Aggarwal, S., Okuzawa, K., and Tanimoto, H.: Diurnal variations of organic molecular tracers and stable carbon isotopic composition in atmospheric aerosols over Mt. Tai in the North China Plain: an influence of biomass burning, *Atmos. Chem. Phys.*, 12, 8359-8375, 2012.

Fu, P. Q., Kawamura, K., Cheng, Y. F., Hatakeyama, S., Takami, A., Li, H., and Wang, W.: Aircraft measurements of polar organic tracer compounds in tropospheric particles (PM10) over central China, *Atmos. Chem. Phys.*, 14, 4185-4199, 2014.

Kawamura, K., and Bikkina, S.: A review of dicarboxylic acids and related compounds in atmospheric aerosols: Molecular distributions, sources and transformation, *Atmos. Res.*, 170, 140-160, 2016.

Liu, D., Li, J., Zhang, Y., Xu, Y., Liu, X., Ding, P., Shen, C., Chen, Y., Tian, C., and Zhang, G.: The use of levoglucosan and radiocarbon for source apportionment of PM<sub>2.5</sub> carbonaceous aerosols at a background site in East China, *Environ. Sci. Technol.*, 47, 10454-10461, 2013.

Myriokefalitakis, S., Tsigaridis, K., Mihalopoulos, N., Sciare, J., Nenes, A., Kawamura, K., Segers, A., and Kanakidou, M.: In-cloud oxalate formation in the global troposphere: a 3-D modeling study, *Atmos. Chem. Phys.*, 11, 5761-5782, 2011.

Pavuluri, C. M., Kawamura, K., Mihalopoulos, N., and Swaminathan, T.: Laboratory photochemical processing of aqueous aerosols: formation and degradation of dicarboxylic acids, oxocarboxylic acids and  $\alpha$ -dicarbonyls, *Atmos. Chem. Phys.*, 15, 7999-8012, 2015.

Shen, L., and Wang, Y.: Changes in tropospheric ozone levels over the Three Representative Regions of China observed from space by the Tropospheric Emission Spectrometer (TES), 2005–2010, *Chin. Sci. Bull.*, 57, 2865-2871, 2012.

Su, M., Lin, Y., Fan, X., Peng, L., and Zhao, C.: Impacts of global emissions of CO, NO<sub>x</sub>, and CH<sub>4</sub> on China tropospheric hydroxyl free radicals, *Adv. Atmos. Sci.*, 29, 838-854, 2012.

Tan, Y., Perri, M. J., Seitzinger, S. P., and Turpin, B. J.: Effects of Precursor Concentration and Acidic Sulfate in Aqueous Glyoxal–OH Radical Oxidation and Implications for Secondary Organic Aerosol, *Environ. Sci. Technol.*, 43, 8105-8112, 2009.

Wang, G. H., Kawamura, K., Hatakeyama, S., Takami, A., Li, H., and Wang, W.: Aircraft measurement of organic aerosols over China, *Environ. Sci. Technol.*, 41, 3115-3120, 2007.

Zhang, Y.-L., and Cao, F.: Fine particulate matter (PM<sub>2.5</sub>) in China at a city level, *Scientific Reports*, 5, 14884, 2015.

1 **Aircraft observations of water-soluble dicarboxylic acids in the aerosols over**  
2 **China**

3 Yan-Lin Zhang<sup>1,2,\*</sup>, Kimitaka Kawamura<sup>2,\*</sup>, Ping Qing Fu<sup>2,3</sup>, S. K.R Boreddy<sup>1</sup>, Tomomi  
4 Watanabe<sup>2</sup>, Shiro Hatakeyama<sup>4,5</sup>, Akinori Takami<sup>5</sup>, Wei Wang<sup>6,†</sup>

5 <sup>1</sup>Yale-NUIST Center on Atmospheric Environment, Nanjing University of Information  
6 Science and Technology, Nanjing10044, China

7 <sup>2</sup>Institute of Low Temperature Science, Hokkaido University, Sapporo 060-0819, Japan

8 <sup>3</sup>LAPC, Institute of Atmospheric Physics, Chinese Academy of Sciences, Beijing 100029,  
9 China

10 <sup>4</sup>Institute of Symbiotic Science and Technology, Tokyo University of Agriculture and  
11 Technology, Fuchu, Tokyo 183-8509, Japan

12 <sup>5</sup>National Institute for Environment Studies, Tsukuba, Ibaraki 305-8506, Japan

13 <sup>6</sup>Chinese Research Academy of Environmental Sciences, Beijing 100012, China

14 †deceased

15 \*Correspondence to: Y. -L. Zhang (dryanlinzhang@gmail.com) or K. Kawamura  
16 ([kawamura@lowtem.hokudai.ac.jp](mailto:kawamura@lowtem.hokudai.ac.jp))

17 Phone: 81-11-706-5457, fax: 81-11-706-7142

## 18 Abstract

19 Vertical profiles of ~~low molecular weight~~ dicarboxylic acids, related organic  
20 compounds and SOA tracer compounds in particle phase have not yet been simultaneously  
21 explored in East Asia, although there is growing evidence that aqueous phase oxidation of  
22 volatile organic compounds may be responsible for the elevated organic aerosols (OA) in the  
23 ~~free~~ troposphere. Here, we found consistently good correlation of oxalic acid, the most  
24 abundant individual organic compounds in aerosols globally, with its precursors as well as  
25 biogenic-derived secondary OA (SOA) compounds in Chinese tropospheric aerosols by aircraft  
26 measurements. Anthropogenically derived dicarboxylic acids (i.e., C<sub>5</sub> and C<sub>6</sub> diacids) at high  
27 altitudes were 4-20 times higher than those from surface measurements and even occasionally  
28 dominant over oxalic acid at altitude higher than 2 km, which is in contrast to the predominance  
29 of oxalic acid previously reported globally including the tropospheric and surface aerosols. This  
30 indicates an enhancement of tropospheric SOA formation from anthropogenic precursors.  
31 Furthermore, oxalic acid-to-sulfate ratio maximized at altitude of ~2 km, explaining aqueous-  
32 phase SOA production that was supported by good correlations with predicted liquid water  
33 content, organic carbon and biogenic SOA tracers. These results demonstrate that elevated  
34 oxalic acid and related SOA compounds from both the anthropogenic and biogenic sources may  
35 substantially contribute to tropospheric OA burden over polluted regions of China, implying  
36 aerosol-associated climate effects and intercontinental transport.

## 37 1 Introduction

38 ~~Low molecular weight (LMW) Water-soluble~~ dicarboxylic acids (diacids), one of the  
39 most abundant organic aerosol (OA) constituents, have been reported in the marine (Kawamura  
40 and Sakaguchi, 1999), remote (Kawamura et al., 1996), desert (Sorooshian et al., 2012),  
41 mountainous, rural, semi-urban, and urban atmosphere (Ho et al., 2007). ~~LMW-diacids As~~  
42 important components of aerosols, diacids play an important role~~s~~ in Earth's climate by directly  
43 scattering sunlight or indirectly by enhancing the ability of OA to act as cloud condensation

44 nuclei (CCN) (Kumar et al., 2003). They can contribute [to wide ranges](#) from a few percent of  
45 the water-soluble mass (Sorooshian et al., 2007b), which could serve as tracers for the  
46 atmospheric processing of water-soluble OA (Ervens et al., 2011), to more than 10% of organic  
47 carbon (OC) in the remote marine atmosphere (Kawamura and Sakaguchi, 1999).

48 LMW diacids in aerosols may be directly emitted from fossil fuel combustion (e.g.  
49 vehicle exhaust) (Kawamura and Kaplan, 1987), biomass burning (Narukawa et al., 1999) and  
50 cooking emissions (Rogge et al., 1991). They can also be formed by degradation from  
51 unsaturated fatty acids (Kawamura et al., 1996) and cyclic alkenes (Hatakeyama et al., 1987).  
52 Laboratory studies have provided direct experimental evidence that stepwise aqueous oxidation  
53 of relatively longer-chain (n) dicarboxylic acids can yield the corresponding short-chain (n-1)  
54 dicarboxylic acids (Enami et al., 2015). In addition, in-cloud and below-cloud measurements  
55 as well as other field measurements have revealed that aqueous-phase oxidation of volatile  
56 organic compounds (VOCs) and intermediates such as glyoxal (Gly), methylglyoxal (MeGly)  
57 and pyruvic acid (Pyr) in wet aerosols or clouds and the subsequent gas-particle partitioning  
58 [are](#) more important pathway for the production of small diacids such as oxalic and malonic  
59 acids (Lim et al., 2013;Carlton et al., 2007;Lim et al., 2005;Carlton et al., 2006;Yu et al.,  
60 2005;Sorooshian et al., 2007b;Sorooshian et al., 2006;Zhang et al., 2016). Oxalic acid (C<sub>2</sub>) is  
61 the most abundant diacid with concentrations ranging from a few ng m<sup>-3</sup> in remote locations  
62 (Kawamura et al., 1996) to hundreds or even up to one thousand ng m<sup>-3</sup> in urban regions (Ho  
63 et al., 2007) and highly forested regions (Falkovich et al., 2005). [Indeed, from a model study it](#)  
64 [has been proposed that photochemical oxidation of isoprene and subsequent partitioning of](#)  
65 [water soluble photooxidation products into the aqueous phase is a predominant formation](#)  
66 [pathway of oxalic acid \(Myriokefalitakis et al., 2011\).](#) ~~Indeed, it has been reported that~~  
67 ~~photochemical oxidation of isoprene is a predominant formation pathway of oxalic acid~~  
68 ~~(Myriokefalitakis et al., 2011).~~

69 Most of the previous studies of diacids [and other organic compounds in aerosols](#) have  
70 been conducted at ground surface; however, only a few aircraft observations that have been

71 conducted over the arctic region (Talbot et al., 1992), the western North Pacific (Narukawa et  
72 al., 1999), the western rim of the Pacific Ocean (Kawamura et al., 2003), the coastal marine  
73 stratocumulus and cumulus clouds over USA (Crahan et al., 2004; Sorooshian et al.,  
74 2013; Sorooshian et al., 2007a; Wonaschuetz et al., 2012; Prabhakar et al., 2014) [and over inland](#)  
75 [agricultural and urban areas in the western United States](#) (Sorooshian et al., 2015). These aircraft  
76 experiments have revealed that water-soluble diacids may be produced by the photochemical  
77 oxidation of anthropogenic organic compounds in the atmosphere and thus play an important  
78 role in controlling the chemical and physical properties of OA in the troposphere. However, the  
79 evidence of secondary production of LWM diacids (i.e., oxalic acid) in tropospheric aerosols  
80 may be not enough due to the lack of dataset from simultaneous measurements of their possible  
81 precursors and/or intermediates such as particle-phase glyoxal (Gly), methylglyoxal (MeGly),  
82 pyruvic acid (Pyr) and glyoxylic acid ( $\omega$ C<sub>2</sub>) as well as other secondary organic aerosol (SOA)  
83 compounds from photochemical oxidation of VOCs such as isoprene and monoterpenes in the  
84 aerosols collected from aircraft campaigns.

85 East Asia is one of the most important source regions of OA (Zhang et al., 2007), and  
86 this is especially true for China due to the rapid urbanization, industrialization and energy  
87 consumption (Huang et al., 2014; Zhang et al., 2015a; Zhang and Cao, 2015). Elevated OA were  
88 found in the free troposphere (~~FT~~) from ACE-Asia aircraft observations, exceeding model-  
89 predicted organic aerosols by a factor of 10-100 (Heald et al., 2011; Heald et al., 2005; Henze  
90 and Seinfeld, 2006). There is growing evidence that SOA formation from aqueous phase  
91 processing of VOCs, especially from isoprene may partially explain the missing OA in the  
92 troposphere over East Asia (Heald et al., 2011; Heald et al., 2005; Henze and Seinfeld, 2006),  
93 however, vertical profiles of LWM diacids, related organic compounds (i.e., ketoacids and  $\alpha$ -  
94 dicarbonyls) and SOA tracer compounds in particle phase have not yet been simultaneously  
95 analyzed in this region. Additional chemical constraints ([e.g. simultaneously measuring](#)  
96 [different types of organic aerosols such as diacids, ketoacids and  \$\alpha\$ -dicarbonyls and SOA tracer](#)  
97 [compounds](#)) are urgently required to investigate the importance of SOA formation pathway to

98 the global/regional budget of OA. Our previous studies have reported the molecular  
99 composition of primary organic aerosols (POA) including n-alkanes, fatty acids, sugars, and  
100 polycyclic aromatic hydrocarbons (PAHs) as well as biogenic SOA tracers in aerosol particles  
101 over China (Wang et al., 2007;Fu et al., 2014). However, chemical composition and molecular  
102 distribution of LMW diacids have never been reported by aircraft measurements over mainland  
103 and coastal China, although only limited studies have been conducted on their spatial  
104 distributions based ground observations (Ho et al., 2007).

105 In this study, we have collected aerosol samples over coastal to inland China using  
106 aircraft during spring, summer and winter. The samples were analyzed for [a](#)-series of LWM  
107 diacids and related compounds as well as SOA tracer compounds to investigate the vertical  
108 profiles, possible sources and formation pathways of LWM diacids and related organic  
109 compounds in the polluted troposphere over China. In light of these analyses, we [identified](#)  
110 [observed](#) that production of oxalic acid and related compounds from anthropogenic and  
111 biogenic precursors is enhanced at high altitudes in the troposphere.

## 112 **2 Materials and Methods**

### 113 **2.1 Aircraft Campaigns**

114 Aircraft measurements were carried out over the coastal East China Sea in winter  
115 (12/25/2002–01/06/2003, n=18) and inland China during summer (08/08/2003–09/13/2003,  
116 n=14) and spring (05/19/2004–06/10/2004, n=16) using Yun-12 and Yun-5 airplanes as  
117 described elsewhere(Wang et al., 2007;Fu et al., 2014) . The sampling heights were from 500  
118 m to 3000 m ([with uncertainty of around 10%](#)) above ground level across many major cities  
119 such as Changzhou, Nanjing, Hefei, Wuhan, Chongqing and Chengdu for inland aerosol  
120 samples as well as Wenzhou, Ningbo, Shanghai, Changzhou, Qingdao and Dalian for coastal  
121 aerosol samples. The detailed flight tracks and flight information are shown in Figure 1 and  
122 Table S1 (see Supporting Information). PM<sub>2.5</sub> aerosols were collected on pre-heated quartz  
123 fiber filter (diameter of 90 mm) using a medium-volume air sampler (Beijing Geological



124 Instrument Factory, China). Aerosol samples were collected for the sampling period from ca.  
125 80 min. to two hours. Air was taken via an inlet installed below the cabin of the aircraft at a  
126 flow rate of 78 L/min. The lack of using organic denuders may lead to a positive artifact (e.g.,  
127 10% of the organic carbon) by possible adsorption of gas-phase organic acids on the quartz  
128 filters (Cheng et al., 2009), but this will not affect our conclusions. Because air conditioning  
129 was not available in the aircraft, the ambient temperatures inside and outside the cabin should  
130 be similar, and thus potential adsorption of gaseous organic acids on quartz filter should be  
131 minimal.

## 132 **2.2 Measurement of LMW diacids**

133 LMW diacids and related organic compounds such as  $\omega$ -oxocarboxylic acids (or  
134 oxoacids), pyruvic acid and  $\alpha$ -dicarbonyls were determined as described elsewhere (Kawamura  
135 and Ikushima, 1993;Ho et al., 2010). Briefly, the sample and blank filters were extracted with  
136 organic free ultrapure water (10 ml  $\times$  3) in a glass vial for 10 min. To remove insoluble particles  
137 and filter debris, the extracts were passed through a Pasteur pipette packed with quartz wool.  
138 The combined extracts were concentrated using a rotary evaporator under a vacuum and then  
139 further concentrated using a nitrogen blow-down system. The concentrated extracts were  
140 reacted with 14%  $\text{BF}_3$ /n-butanol to derive carboxyl group to dibutyl ester and oxo group to  
141 dibutoxy acetals.

142 The derivatives were extracted with n-hexane, concentrated to near dryness, dissolved  
143 with n-hexane in 1.5 ml glass vials. The samples were finally determined using a gas  
144 chromatography (GC, HP6980) with a split/splitless injection, fused silica capillary column  
145 (HP-5, 0.2 mm i.d.  $\times$  25 m long  $\times$  0.52  $\mu\text{m}$  film thickness) and a flame ionization detector.  
146 Identification of the compounds was performed by GC retention times with those of authentic  
147 standards and GC/mass spectrometry analyses. Recoveries of authentic standards spiked to a  
148 pre-heated quartz fiber filter were generally better than 85% for all organic compound identified  
149 except for oxalic acid (78%), pyruvic acid (72%), and methylglyoxal (55%). Duplicate analyses

150 of filter samples from other sites indicated that analytical errors are smaller than 15%. During  
151 the aircraft campaigns, field blank filters were mounted onto the sampler for seconds without  
152 pumping. Blank and sample filters were placed individually in a clean (pre-combusted at 450  
153 °C for 6 h) glass jar sealed with a Teflon-lined screw cap, transported to the laboratory, and  
154 stored at -20 °C prior to analysis (Wang et al., 2007).

155 Small peaks of oxalic, malonic and glyoxylic acids were found in the field and lab  
156 blanks, but they were smaller than 10% of the real samples. The concentrations reported here  
157 are all corrected for the field blanks but not for the recoveries. The method of SOA tracers  
158 measurement was described elsewhere (Fu et al., 2014) .

### 159 **2.3 Measurements of EC and OC**

160 The concentrations of organic carbon (OC) and elemental carbon (EC) were measured  
161 with thermal-optical transmittance method by OC/EC Carbon Aerosol Analyzer (Sunset  
162 Laboratory Inc., USA) following the IMPROVE protocol (Chow et al., 2004). All the analyses  
163 of the filter samples were completed in 2006.

### 164 **2.4 Estimation of liquid water content and aerosol acidity**

165 Liquid water content (LWC) and aerosol acidity were predicted by ISORROPIA II,  
166 which is a thermodynamic equilibrium model with robust and rapid convergence for all aerosol  
167 types (Fountoukis and Nenes, 2007). Measured concentrations of water-soluble inorganic ions,  
168 ambient temperature and relative humidity were used as input.

## 169 **3 Results and discussion**

### 170 **3.1 Concentrations and molecular distributions**

171 Total concentrations of LWM diacids and related compounds quantified in the inland  
172 aircraft PM<sub>2.5</sub> (i.e., particulate matter with a diameter smaller than 2.5 µm) are 730±328 and  
173 586±457 ng m<sup>-3</sup> during summer and spring, respectively, while in the coastal aerosols, the

174 average concentration is  $254 \pm 209 \text{ ng m}^{-3}$  in winter (Table 1). It is of great interest to note that  
175 the concentrations of diacids in the [troposphere](#) over the Arctic and North Pacific are  
176 generally much lower than those reported at ground levels (Kawamura et al., 1996; Kawamura  
177 and Sakaguchi, 1999); however, the concentrations in the troposphere over mainland China are  
178 within the range of or even higher than those reported at ground levels in major cities (Ho et  
179 al., 2007; Kawamura and Ikushima, 1993). Due to the enhanced anthropogenic emissions,  
180 concentrations of POA (i.e., n-alkanes, fatty acids, sugars, lignin and resin products, sterols,  
181 PAHs, and phthalic acids) are higher in winter than those in summer and spring (Wang et al.,  
182 2007). In contrast, the concentrations of diacids in summer and spring are 2-15 times higher  
183 than those in winter, indicating that these compounds are mostly of secondary origin via the  
184 oxidation of their gaseous precursors such as isoprene and  $\alpha/\beta$ -pinene (Kanakidou et al.,  
185 2005; Carlton et al., 2006; Carlton et al., 2007; Carlton et al., 2009; Ervens et al., 2011) as  
186 discussed below.

187 Molecular distributions of diacids ([C<sub>n</sub> is n-numbered carbon diacid](#)) in our study are  
188 generally characterized by the predominance of oxalic acid (C<sub>2</sub>) followed by succinic (C<sub>4</sub>) and  
189 malonic (C<sub>3</sub>) acids during spring and winter, being consistent with previous findings obtained  
190 in Chinese megacities (Ho et al., 2007) (Figure 2a). However, in many summer samples  
191 collected at height of above 2 km, we found the predominance of glutaric (C<sub>5</sub>) and adipic (C<sub>6</sub>)  
192 acids (see Figure 2b), which are the major organic compounds produced by the oxidation of  
193 anthropogenic cyclohexene and methylenecyclohexane (Hamilton et al., 2006; Muller et al.,  
194 2007). [Although C5 and C6 diacids are the ozonolysis products in smog chamber studies,](#)  
195 [Pavuluri et al. \(2015\) recently proposed that C5 and C6 acids are produced by photochemical](#)  
196 [processing of aqueous aerosols from a laboratory study.](#) Such a molecular distribution has not  
197 been reported for the ~~free~~-tropospheric and ground level aerosols (Hatakeyama et al.,  
198 1987; Enami et al., 2015; Kawamura and Bikkina, 2016). In our measurements, the averaged  
199 concentrations of C<sub>5</sub> and C<sub>6</sub> in summer are  $159 \pm 79 \text{ ng m}^{-3}$  and  $93.9 \pm 23.2 \text{ ng m}^{-3}$ , which are 4-  
200 20 times higher than those in ground measurements in many megacities in China (Ho et al.,

201 2007), Tokyo (Kawamura and Yasui, 2005) and Los Angeles (Kawamura and Kaplan, 1987).  
202 Such high abundances of C<sub>5</sub> and C<sub>6</sub> observed in summer imply an important formation pathway  
203 associated with enhanced photochemical oxidation of anthropogenic precursors in the polluted  
204 troposphere over China.

### 205 3.2 C<sub>3</sub> (C<sub>2</sub>) to C<sub>4</sub> ratio

206 The malonic to succinic acid (C<sub>3</sub>/C<sub>4</sub>) ratios can provide information on source,  
207 formation pathways and photochemical aging of organic aerosols. C<sub>3</sub>/C<sub>4</sub> ratios in aerosols  
208 derived from vehicular exhausts (i.e., 0.25–0.44, av. 0.35) (Kawamura and Kaplan, 1987) have  
209 lower values than those in ambient aerosols from Tokyo (i.e., 0.56–2.9, av. 1.6) (Kawamura  
210 and Ikushima, 1993) and China's megacities (i.e., 0.6–1.1, average 0.74) (Ho et al., 2007). In  
211 contrast, the ratios are substantially higher for aged aerosols because C<sub>3</sub> is more produced by  
212 photochemical processing of C<sub>4</sub> (Kawamura and Ikushima, 1993). Actually, higher C<sub>3</sub>/C<sub>4</sub> ratios  
213 are observed for remote marine aerosols from the North Pacific including tropic (range: 1–11,  
214 av. 3.9) which are subjected to extensive aging during the long-range atmospheric transport  
215 (Kawamura and Sakaguchi, 1999). In this study, C<sub>3</sub>/C<sub>4</sub> ratios are 0.5±0.4 in summer, 0.9±0.1  
216 in spring (Table 1), and 0.7±0.2 in winter, apparently smaller than those in aerosols affected by  
217 atmospheric aging, but similar to that of urban aerosols in China (i.e., 0.9 in summer and 0.6 in  
218 winter) (Ho et al., 2007). [In addition, C<sub>3</sub> and C<sub>4</sub> diacids can be formed by OH reactions of](#)  
219 [water soluble organic compounds such as glyoxal \(Tan et al., 2009\) and C<sub>3</sub>/C<sub>4</sub> ratios gradually](#)  
220 [decrease with the reaction time \(Pavuluri et al., 2015\). The lower C<sub>3</sub>/C<sub>4</sub> ratios in summer](#)  
221 [indicate that diacid aerosols are relatively fresh but will be subjected to more atmospheric aging](#)  
222 [than in other seasons due to increasing OH concentrations and solar radiation.](#)

223 C<sub>2</sub>/C<sub>4</sub> ratios (2.0 in summer, 4.6 in spring and 4.6 in winter) in our study are found to  
224 be much smaller than those from ground observations in China during summer (inland cities in  
225 summer: av. 7.1) and winter (coastal cities in winter: av. 7.9). The lower C<sub>2</sub>/C<sub>4</sub> and C<sub>3</sub>/C<sub>4</sub> ratios  
226 could be also resulting from degradation of C<sub>2</sub> and C<sub>3</sub> in high altitudes due to increased solar

227 radiation. However, no strong correlation ( $p>0.05$ ) is found between  $C_2/C_4$  (and  $C_3/C_4$ ) and  
228 sampling altitude although solar radiation is expected to increase with increasing altitudes.  
229 These results suggest that the degradation of higher homologous diacids (i.e.,  $C_4$ ) is not an  
230 important pathway for the production of tropospheric  $C_2$  and  $C_3$  in China, and primary fossil-  
231 fuel emissions and/or secondary production from other precursors are major formation  
232 pathways of these small diacids (i.e.,  $C_2$ ,  $C_3$  and  $C_4$ ).

### 233 3.3 Cis/trans ratio

234 It has been revealed that maleic acid (M, *cis* configuration) is produced by  
235 photochemical oxidation of anthropogenic aromatic hydrocarbons such as benzene and toluene,  
236 which is predominant over fumaric acid (F, *trans* configuration) (Sempere and Kawamura,  
237 1996). M can be photo-isomerized to its *trans* isomer (F) in the atmosphere under solar  
238 radiation. M/F ratios (4.9, 4.5 and 6.8 for summer, spring and winter, respectively) are much  
239 higher in the present study than those reported in marine region (0.1-1.5) (Fu et al., 2013) and  
240 Chinese megacities at ground levels (2.0 and 2.2 for summer and winter, respectively) (Ho et  
241 al., 2007). This indicates that only a small fraction of maleic acid is isomerized to fumaric acid  
242 by photochemical transformation and thus SOA produced from anthropogenic emissions in the  
243 lower/middle troposphere in China is mostly fresh without substantially photochemical  
244 processing (Cong et al., 2015).

### 245 3.4 $C_5$ ( $C_6$ ) to $C_9$ diacid ratio

246  $C_6$  (or  $C_5$ ) to azelaic acid ( $C_9$ ) ratio (i.e.,  $C_6/C_9$  or  $C_5/C_9$ ) is often used as an indicator  
247 of relative contribution from anthropogenic and biogenic sources to OA (Kawamura and Yasui,  
248 2005).  $C_6/C_9$  and  $C_5/C_9$  ratios during the summer aircraft campaign are on average 17 and 28,  
249 respectively, which are >15 times higher than those reported at the ground surface from major  
250 Chinese cities (Ho et al., 2007; Wang et al., 2002). This comparison further supports that  
251 anthropogenic sources are an important source of OA in the high altitudes over China. Taken  
252 together with other possible SOA components (e.g., oligomers with MW > 250 Da) produced

253 during the oxidation of anthropogenic VOCs, our result implies that SOA formation plays an  
254 important role in OA budget in the troposphere especially during summer when atmospheric  
255 oxidation capacity is significantly enhanced ([Shen and Wang, 2012](#); [Su et al., 2012](#)). It is  
256 important to note that the correlation coefficient of C<sub>6</sub> (or C<sub>5</sub>) with C<sub>2</sub> during summer (r<sup>2</sup>=0.39  
257 or 0.49) is lower than that obtained in winter (r<sup>2</sup>=0.76 or 0.59) and spring (r<sup>2</sup>=0.95 or 0.96),  
258 suggesting that C<sub>2</sub> has a different formation pathway and/or its precursors are mostly from  
259 biogenic origins (i.e., isoprene) in summer.

### 260 **3.5 Correlation of diacids with SOA tracers [and biomass burning tracers](#)**

261 In the urban atmosphere, dicarboxylic acids can be emitted as primary particles from  
262 motor exhausts (Kawamura and Kaplan, 1987), biomass burning (Cong et al., 2015; Falkovich  
263 et al., 2005), and cooking emissions (Rogge et al., 1991). However, recent field, laboratory and  
264 model studies have demonstrated that aqueous-phase SOA formation from isoprene or other  
265 precursors photooxidation is a major formation pathway of LMW diacids (Myriokefalitakis et  
266 al., 2011; Carlton et al., 2006; Ervens et al., 2011). Furthermore, significant correlations (r>0.70,  
267 p<0.05) are obtained between C<sub>2</sub> and its possible precursors and intermediates such as glyoxylic  
268 acid ( $\omega$ C<sub>2</sub>), pyruvic acid (Pyr), glyoxal (Gly) and methylglyoxal (MeGly) in all three campaigns  
269 (Table 2). This demonstrates that C<sub>2</sub> is produced from its precursor compounds such as Pyr,  
270 Gly ~~and~~, MeGly ~~and~~  $\omega$ C<sub>2</sub> through the following formation pathways: (CH<sub>3</sub>COCOOH,  
271 HCO-CHO, CH<sub>3</sub>COCHO) → HCO-COOH → HOOC-COOH (Carlton et al., 2009; Carlton  
272 et al., 2007; Carlton et al., 2006; Lim et al., 2013). ~~Based on the GEOS-Chem Global 3-D~~  
273 ~~chemical transport model, Gly may be derived from both biogenic and anthropogenic VOCs~~  
274 ~~whereas MeGly is more specific to biogenic isoprene (Fu et al., 2008).~~ We found that the  
275 correlation coefficient between Gly and C<sub>2</sub> is higher than that between MeGly and C<sub>2</sub> for winter  
276 and spring samples, [being consistent with the fact that oxalic acid is the dominant product of](#)  
277 [glyoxal with the high yield but not for methylglyoxal](#) (Tan et al., 2009; Lim et al., 2010). [Indeed,](#)  
278 [a good correlation \(Figure 3\) was found between predicted liquid water content with both OC](#)  
279 [and oxalic acid, indicating an important contribution from SOA formation via cloud processing](#)

280 [and/or aqueous-phase oxidation. Aqueous-phase production of oxalic acid and related](#)  
281 [compounds may increase the abundances of SOA at the middle troposphere \(around 2 km in](#)  
282 [this study\), as discussed below. With the GEOS-Chem model based on the Fu et al. \(2008\)](#)  
283 [scheme \(Fu et al., 2008\), aqueous-phase SOA has a pronounced enhancement in the lower free](#)  
284 [troposphere \(2-6 km\) \(Heald et al., 2011\), which may explain to some extent the elevated levels](#)  
285 [of oxalic acid around at ~2 km in altitude.](#)

286 ~~suggesting a substantial contribution of SOA formation from anthropogenic VOCs~~  
287 ~~during these two seasons.~~

288 Similarly, C<sub>2</sub> also shows better correlations with both anthropogenic-derived SOA such  
289 as C<sub>5</sub> and C<sub>6</sub> for winter (r<sup>2</sup>=0.76 or 0.59) and spring (r<sup>2</sup>=0.95 or 0.96) samples than summer  
290 samples (r<sup>2</sup>=0.39 or 0.49), further supporting that anthropogenic VOCs play a more important  
291 role in SOA formation than biogenic VOCs during winter and spring. [A recent study reveals](#)  
292 [that air pollutants such as SO<sub>2</sub>, NO<sub>2</sub>, PM<sub>2.5</sub> and PM<sub>10</sub> are higher in winter than in summer and](#)  
293 [spring and these air pollutants are mostly from anthropogenic emissions](#) (Zhang and Cao, 2015).  
294 No significant correlation (r<sup>2</sup>=0.28, p>0.05) is found between EC (i.e., a primary tracer for  
295 fossil fuel biomass combustion (Zhang et al., 2015b)) and C<sub>2</sub> in summer aerosols, whereas a  
296 good correlation is found in spring. These results indicate that primary emissions are not major  
297 sources of C<sub>2</sub> during summer, but their contribution may be more important in spring.

298 Oxalic acid shows a strong positive correlation with isoprene-derived SOA tracers such  
299 as 2-methylglyceric acid (2-MGA) and C<sub>5</sub>-alkene triols (cis-2-methyl-1,3,4-trihydroxy-1-  
300 butene,3-methyl-2,3,4-trihydroxy-1-butene plus trans-2-methyl-1,3,4-trihydroxy-1-butene)  
301 (Figure 34), but a very weak correlation (r<sup>2</sup> = 0.26, p>0.05) with 2-methyltetrols (2-  
302 methylthreitol and 2-methylerythritol). Previous studies have revealed that 2-methyltetrols  
303 could be formed through diepoxy derivatives of isoprene through acid-catalyzed hydrolysis  
304 (Wang et al., 2005), whereas 2-MGA is produced by further [gas-phase](#) oxidation of its  
305 intermediates such as methacrolein and methacrylic acid from isoprene (Claeys et al.,

2004;Surratt et al., 2006). Such a good correlation between 2-MGA and oxalic acid could demonstrate that oxalic acid has a very close link with the higher-generation products of isoprene in the presence of relatively high NO<sub>x</sub> (i.e., NO<sub>x</sub> averaged to 6.6±4.0 ppbv in summer and 3.9±3.3 ppbv), which could serve as precursors of oxalic acid over China., which could serve as precursors of oxalic acid over China. Oxalic acid also significantly correlates with  $\alpha/\beta$ -pinene-SOA tracers (i.e., pinonic, pinic, 3-hydroxyglutaric, and 3-methyl-1,2,3-butanetricarboxylic acid) and  $\beta$ -caryophyllene tracer ( $\beta$ -caryophyllinic acid, see Figure 43) (Jaoui et al., 2013).

Overall, both oxalic acid and SOA tracers are more abundant in summer than in spring, suggesting that production of these organics is associated with higher oxidation capacity, emission strength and solar radiation in summer. Based on the consistent good correlations of oxalic acid with SOA tracers derived from isoprene, monoterpene and  $\beta$ -caryophyllene, we propose that a large fraction of oxalic acid in the lower/middle troposphere detected within the atmospheric boundary layer over China is of secondary origin, i.e., via aqueous chemistry mostly via atmospheric oxidation of gaseous precursors uplifted aloft from ground surface. This study highlights that oxalic acid ~~may should~~ serve as an important tracer of SOA formation not only on the ground surface but also at high altitudes within the lower/middle troposphere. Therefore, the high abundances of LWM diacids (C<sub>2</sub>-C<sub>6</sub>) observed in this study imply an important contribution to the OA budget from SOA production from both biogenic and anthropogenic precursors emitted from the ground surface to high altitudes over inland China.

The observed total concentrations of oxalic acid and other LWM diacids identified in this study (Table 1) show the same magnitude as the levels of SOA (i.e., 299±173 ng m<sup>-3</sup> in summer and 257±210 ng m<sup>-3</sup> in spring) estimated by SOA-tracer methods (Fu et al., 2014). It should be noted that oxalic acid is not included in the traditional “SOA tracer method” (Kleindienst et al., 2007) and therefore SOA may be underestimated if SOA is calculated by this approach. Although oxalic acid has relatively high vapor pressure, it has been observed as



333 the most abundant individual organic compounds in aerosols (Kawamura and Bikkina, 2016).  
334 Our study together with many previous studies have revealed that oxalic acid is mostly from  
335 aqueous-phase production and is therefore of secondary origin (Myriokefalitakis et al., 2011).  
336 In addition, oxalic acid may partly exist as hydrated and/or salt forms in aerosols. Therefore, it  
337 is important to consider oxalic acid or oxalate as important SOA tracers.

338 Levoglucosan (1,6-Anhydro- $\beta$ -D-glucopyranose) has been used as a source tracer for  
339 biomass burning (Liu et al., 2013;Fu et al., 2012). Levoglucosan shows a significant correlation  
340 with oxalic acid and also secondary organic aerosol (SOA) tracers (Figure 5), indicating that  
341 that biomass burning is an important source of oxalic acid and SOA. It is interesting to note  
342 that levoglucosan was more abundant in spring than in summer. In addition, regression slope  
343 and correlation coefficient between oxalic acid and levoglucosan are higher in spring (i.e.,  
344 slope: 2.7, r: 0.95) than in summer (i.e., slope: 1.7, r: 0.67), indicating that biomass-burning  
345 emissions play more important roles in spring than summer. Such higher values of slope of  
346 regression line and correlation coefficient were also found between levoglucosan and  $\alpha/\beta$ -  
347 pinene- and  $\beta$ -caryophyllene-oxidation products, emphasizing an importance of springtime  
348 biomass burning. However, isoprene-oxidation products have a higher correlation coefficient  
349 in summer than in spring, implying that biomass burning in summer is an important contributor  
350 of isoprene-derived SOA.

351 ~~Inclusion of oxalic acid (and also other LWM diacids) as major products from atmospheric~~  
352 ~~oxidation of biogenic (and also anthropogenic) VOCs may partially reduce the discrepancy~~  
353 ~~between modeled and observed tropospheric OA during the ACE Asia campaign , although~~  
354 ~~further studies are still required to investigate other SOA compounds (e.g., oligomeric~~  
355 ~~components) produced from anthropogenic and biogenic VOCs in the reactions to fully~~  
356 ~~understand the associated formation pathway and mechanism.~~

357 **diacids**

358 As shown in Figure 64, the highest concentrations of oxalic acid and total diacids are  
359 observed around at 2 km in altitude during summer with a sharp decrease toward 3 km.  
360 However, during spring and winter, their concentrations decrease with increasing altitudes due  
361 to the atmospheric dilution during upward transport. Much clear trends are observed in the  
362 vertical profiles of oxalic acid normalized by anthropogenic tracers such as sulfate ( $\text{SO}_4^{2-}$ ),  
363 vanadium, and bulk OC. Interestingly, similar trends are also found in spring and winter  
364 samples, but the trends are weaker, suggesting that a secondary production of oxalic acid is  
365 largely enhanced ~~in summer~~ during summer at higher altitudes of in the upper lower troposphere  
366 (~2 km). Similar vertical pattern has been also reported for biogenic SOA-tracers such as 2-  
367 MGA, 3-HGA and MBTCA (3-methyl-1,2,3-butanetricarboxylic acid), but not for POA such  
368 as biomass burning tracers (e.g., levoglucosan), fungal spore tracers (arabitol and mannitol),  
369 sucrose, and trehalose (Fu et al., 2014). These results further demonstrate that oxalic acid is  
370 mostly likely produced by secondary process in the troposphere.

371 Oxalic acid ~~and related organic species identified~~ in the high altitudes could not be  
372 simply explained by uplifting transport of pre-existing SOA produced on the ground surface  
373 because these SOA compounds relative to anthropogenic tracers such as  $\text{SO}_4^{2-}$ , vanadium, and  
374 OC significantly increased with altitude as stated above. This finding suggests that in-situ SOA  
375 production by the oxidation of VOCs lifted from ground surface substantially contributes to the  
376 observed levels of oxalic acid and related species. Therefore, SOA formation in cloud or wet  
377 aerosol via the oxidation of biogenic and anthropogenic VOCs may increase concentrations of  
378 oxalic acid at higher altitudes in the lower troposphere. There is growing evidence to support  
379 of in-cloud formation of oxalic acid and related SOA. Many studies suggest that oxalic acid is  
380 mostly produced via aqueous-phase oxidation of water-soluble organics such as glyoxal,  
381 methylglyoxal, pyruvic acid and glyoxylic acid, which are oxidation intermediates of various  
382 VOCs (Ervens et al., 2004; Carlton et al., 2006; Ervens et al., 2011). ~~Indeed, a good correlation~~  
383 ~~(Figure 5) was found between predicted liquid water content with both OC and oxalic acid,~~  
384 ~~indicating an important contribution from SOA formation via cloud processing and/or aqueous-~~

385 ~~phase oxidation. This formation pathway is also supported by the consistently good correlation~~  
386 ~~among these species identified in our study as discussed previously. Aqueous phase production~~  
387 ~~of oxalic acid and related compounds may increase the abundances of SOA at the lower FT~~  
388 ~~(around 2 km in this study). With the GEOS-Chem model based on the Fu et al. (2008) scheme~~  
389 ~~(Fu et al., 2008), aqueous phase SOA has a pronounced enhancement in the lower FT (2–6 km)~~  
390 ~~(Heald et al., 2011), which may explain to some extent the elevated levels of oxalic acid around~~  
391 ~~at ~2 km in altitude.~~

#### 392 **4 Conclusions**

393         Based on three aircraft measurements over East Asia, this study demonstrates an  
394 aqueous-phase mechanism for SOA productions of diacids in the troposphere following  
395 correlation analysis of oxalic acid in tropospheric aerosols with other measured chemical  
396 variables including its precursors and its intermediate as well as biogenic-derived SOA from  
397 isoprene, monoterpenes and  $\beta$ -caryophyllene. In addition to biogenic-derived SOA compounds,  
398 anthropogenic-derived dicarboxylic acids (e.g. C5 and C6 diacids) are 4–20 times higher than  
399 those from ground measurements and even occasionally dominant over oxalic acid at altitudes  
400 higher than 2 km in summer, which is in contrast to the predominance of oxalic acid previously  
401 reported globally including the tropospheric and surface aerosols. The results suggest an  
402 important formation pathway associated with enhanced photochemical oxidation of  
403 anthropogenic precursors in the polluted troposphere over China. Their relative contribution of  
404 anthropogenic and biogenic sources is subject to future studies. The combination of radiocarbon  
405 ( $^{14}\text{C}$ ) measurement of water-soluble organic carbon (WSOC) and specific SOA compounds  
406 (e.g., oxalic acid) may provide better insights on biogenic and fossil sources of SOA (Zhang et  
407 al., 2014; Zhang et al., 2015a; Noziere et al., 2015) .

408         The present study demonstrates that secondary formation of oxalic acid in aqueous  
409 phase plays an important role in the SOA budget from the near surface to the lower FT (i.e., 2  
410 km) over inland China, whereas dilution of pre-existing particles and VOCs, photochemical

411 decomposition and aerosol processing may decrease the levels of oxalic acid and related  
412 compounds at higher altitudes (>2 km). Our findings also highlight that water-soluble LMW  
413 diacids and other SOA components may ~~control~~ [have important impacts on](#) the chemical  
414 compositions, physical properties and budget of OA in the polluted troposphere over China,  
415 and thus significantly affect the regional/global climate and intercontinental transport  
416 especially over the Pacific Ocean.

#### 417 **Acknowledgements**

418 The data reported in the paper are presented in the Supplementary Materials or are  
419 available upon request from the Y.-L.Z. The authors acknowledge the Ministry of Education,  
420 Culture, Sports, Science and Technology for financial support to perform the aircraft campaigns  
421 through Scientific Research on Priority Areas on Atmospheric Environmental Impacts of  
422 Aerosols in East Asia (no. 416, 2002–2005). The authors also acknowledge Dr. Hong Li from  
423 Chinese Research Academy of Environmental Sciences for her support and help during the  
424 aircraft measurements. This study was also supported by a grant-in-aid no. 14204055 and  
425 24221001 from the Japan Society for the Promotion of Science (JSPS).

#### 426 **References**

- 427 Carlton, A. G., Turpin, B. J., Lim, H. J., Altieri, K. E., and Seitzinger, S.: Link between  
428 isoprene and secondary organic aerosol (SOA): Pyruvic acid oxidation yields low volatility  
429 organic acids in clouds, *Geophys. Res. Lett.*, 33, L06822, 2006.
- 430 Carlton, A. G., Turpin, B. J., Altieri, K. E., Seitzinger, S., Reff, A., Lim, H. J., and Ervens, B.:  
431 Atmospheric oxalic acid and SOA production from glyoxal: Results of aqueous  
432 photooxidation experiments, *Atmos. Environ.*, 41, 7588-7602, 2007.
- 433 Carlton, A. G., Wiedinmyer, C., and Kroll, J. H.: A review of Secondary Organic Aerosol  
434 (SOA) formation from isoprene, *Atmos. Chem. Phys.*, 9, 4987-5005, 2009.
- 435 Cheng, Y., He, K. B., Duan, F. K., Zheng, M., Ma, Y. L., and Tan, J. H.: Positive sampling  
436 artifact of carbonaceous aerosols and its influence on the thermal-optical split of OC/EC,  
437 *Atmos. Chem. Phys.*, 9, 7243-7256, 2009.
- 438 Chow, J. C., Watson, J. G., Chen, L. W. A., Arnott, W. P., Moosmüller, H., and Fung, K.:  
439 Equivalence of elemental carbon by thermal/optical reflectance and transmittance with  
440 different temperature protocols, *Environ. Sci. Technol.*, 38, 4414-4422, 2004.

441 Claeys, M., Graham, B., Vas, G., Wang, W., Vermeylen, R., Pashynska, V., Cafmeyer, J.,  
442 Guyon, P., Andreae, M. O., Artaxo, P., and Maenhaut, W.: Formation of secondary organic  
443 aerosols through photooxidation of isoprene, *Science*, 303, 1173-1176, 2004.

444 Cong, Z. Y., Kawamura, K., Kang, S. C., and Fu, P. Q.: Penetration of biomass-burning  
445 emissions from South Asia through the Himalayas: new insights from atmospheric organic  
446 acids, *Scientific Reports*, 5, 9580, 2015.

447 Crahan, K. K., Hegg, D., Covert, D. S., and Jonsson, H.: An exploration of aqueous oxalic  
448 acid production in the coastal marine atmosphere, *Atmos. Environ.*, 38, 3757-3764, 2004.

449 Enami, S., Hoffmann, M. R., and Colussi, A. J.: Stepwise Oxidation of Aqueous Dicarboxylic  
450 Acids by Gas-Phase OH Radicals, *J. Phys. Chem. Lett.*, 6, 527-534, 2015.

451 Ervens, B., Feingold, G., Frost, G. J., and Kreidenweis, S. M.: A modeling study of aqueous  
452 production of dicarboxylic acids: 1. Chemical pathways and speciated organic mass  
453 production, *J. Geophys. Res.*, 109, D15205, 2004.

454 Ervens, B., Turpin, B. J., and Weber, R. J.: Secondary organic aerosol formation in cloud  
455 droplets and aqueous particles (aqSOA): a review of laboratory, field and model studies,  
456 *Atmos. Chem. Phys.*, 11, 11069-11102, 2011.

457 Falkovich, A. H., Graber, E. R., Schkolnik, G., Rudich, Y., Maenhaut, W., and Artaxo, P.:  
458 Low molecular weight organic acids in aerosol particles from Rondonia, Brazil, during the  
459 biomass-burning, transition and wet periods, *Atmos. Chem. Phys.*, 5, 781-797, 2005.

460 Fountoukis, C., and Nenes, A.: ISORROPIA II: a computationally efficient thermodynamic  
461 equilibrium model for  $K^+-Ca^{2+}-Mg^{2+}-NH_4^+-Na^+-SO_4^{2-}-NO_3^- -Cl^- -H_2O$  aerosols,  
462 *Atmos. Chem. Phys.*, 7, 4639-4659, 2007.

463 Fu, P., Kawamura, K., Chen, J., Li, J., Sun, Y., Liu, Y., Tachibana, E., Aggarwal, S.,  
464 Okuzawa, K., and Tanimoto, H.: Diurnal variations of organic molecular tracers and stable  
465 carbon isotopic composition in atmospheric aerosols over Mt. Tai in the North China Plain:  
466 an influence of biomass burning, *Atmos. Chem. Phys.*, 12, 8359-8375, 2012.

467 Fu, P., Kawamura, K., Usukura, K., and Miura, K.: Dicarboxylic acids, ketocarboxylic acids  
468 and glyoxal in the marine aerosols collected during a round-the-world cruise, *Mar. Chem.*,  
469 148, 22-32, 2013.

470 Fu, P. Q., Kawamura, K., Cheng, Y. F., Hatakeyama, S., Takami, A., Li, H., and Wang, W.:  
471 Aircraft measurements of polar organic tracer compounds in tropospheric particles (PM<sub>10</sub>)  
472 over central China, *Atmos. Chem. Phys.*, 14, 4185-4199, 2014.

473 Fu, T. M., Jacob, D. J., Wittrock, F., Burrows, J. P., Vrekoussis, M., and Henze, D. K.: Global  
474 budgets of atmospheric glyoxal and methylglyoxal, and implications for formation of  
475 secondary organic aerosols, *J. Geophys. Res.*, 113, D15303, 2008.

476 Hamilton, J. F., Lewis, A. C., Reynolds, J. C., Carpenter, L. J., and Lubben, A.: Investigating  
477 the composition of organic aerosol resulting from cyclohexene ozonolysis: low molecular  
478 weight and heterogeneous reaction products, *Atmos. Chem. Phys.*, 6, 4973-4984, 2006.

479 Hatakeyama, S., Ohno, M., Weng, J. H., Takagi, H., and Akimoto, H.: Mechanism for the  
480 Formation of Gaseous and Particulate Products from Ozone-Cycloalkene Reactions in Air,  
481 *Environ. Sci. Technol.*, 21, 52-57, 1987.

482 Heald, C. L., Jacob, D. J., Park, R. J., Russell, L. M., Huebert, B. J., Seinfeld, J. H., Liao, H.,  
483 and Weber, R. J.: A large organic aerosol source in the free troposphere missing from current  
484 models, *Geophys. Res. Lett.*, 32, L18809, 2005.

485 Heald, C. L., Coe, H., Jimenez, J. L., Weber, R. J., Bahreini, R., Middlebrook, A. M., Russell,  
486 L. M., Jolleys, M., Fu, T. M., Allan, J. D., Bower, K. N., Capes, G., Crosier, J., Morgan, W.  
487 T., Robinson, N. H., Williams, P. I., Cubison, M. J., DeCarlo, P. F., and Dunlea, E. J.:  
488 Exploring the vertical profile of atmospheric organic aerosol: comparing 17 aircraft field  
489 campaigns with a global model, *Atmos. Chem. Phys.*, 11, 12673-12696, 2011.

490 Henze, D. K., and Seinfeld, J. H.: Global secondary organic aerosol from isoprene oxidation,  
491 *Geophys. Res. Lett.*, 33, L09812, 2006.

492 Ho, K. F., Cao, J. J., Lee, S. C., Kawamura, K., Zhang, R. J., Chow, J. C., and Watson, J. G.:  
493 Dicarboxylic acids, ketocarboxylic acids, and dicarbonyls in the urban atmosphere of China,  
494 *J. Geophys. Res.*, 112, D22S27, 2007.

495 Ho, K. F., Lee, S. C., Ho, S. S. H., Kawamura, K., Tachibana, E., Cheng, Y., and Zhu, T.:  
496 Dicarboxylic acids, ketocarboxylic acids, alpha-dicarbonyls, fatty acids, and benzoic acid in  
497 urban aerosols collected during the 2006 Campaign of Air Quality Research in Beijing  
498 (CAREBeijing-2006), *J. Geophys. Res.*, 115, 2010.

499 Huang, R. J., Zhang, Y., Bozzetti, C., Ho, K. F., Cao, J. J., Han, Y., Daellenbach, K. R.,  
500 Slowik, J. G., Platt, S. M., Canonaco, F., Zotter, P., Wolf, R., Pieber, S. M., Bruns, E. A.,  
501 Crippa, M., Ciarelli, G., Piazzalunga, A., Schwikowski, M., Abbaszade, G., Schnelle-Kreis,  
502 J., Zimmermann, R., An, Z., Szidat, S., Baltensperger, U., El Haddad, I., and Prevot, A. S.:  
503 High secondary aerosol contribution to particulate pollution during haze events in China,  
504 *Nature*, 514, 218-222, 2014.

505 Jaoui, M., Kleindienst, T. E., Docherty, K. S., Lewandowski, M., and Offenberg, J. H.:  
506 Secondary organic aerosol formation from the oxidation of a series of sesquiterpenes: alpha-  
507 cedrene, beta-caryophyllene, alpha-humulene and alpha-farnesene with O-3, OH and NO3  
508 radicals, *Environ. Chem.*, 10, 178-193, 2013.

509 Kanakidou, M., Seinfeld, J. H., Pandis, S. N., Barnes, I., Dentener, F. J., Facchini, M. C., Van  
510 Dingenen, R., Ervens, B., Nenes, A., Nielsen, C. J., Swietlicki, E., Putaud, J. P., Balkanski,  
511 Y., Fuzzi, S., Horth, J., Moortgat, G. K., Winterhalter, R., Myhre, C. E. L., Tsigaridis, K.,

512 Vignati, E., Stephanou, E. G., and Wilson, J.: Organic aerosol and global climate modelling: a  
513 review, *Atmos. Chem. Phys.*, 5, 1053-1123, 2005.

514 Kawamura, K., and Kaplan, I. R.: Motor Exhaust Emissions as a Primary Source for  
515 Dicarboxylic-Acids in Los-Angeles Ambient Air, *Environ. Sci. Technol.*, 21, 105-110, 1987.

516 Kawamura, K., and Ikushima, K.: Seasonal-Changes in the Distribution of Dicarboxylic-  
517 Acids in the Urban Atmosphere, *Environ. Sci. Technol.*, 27, 2227-2235, 1993.

518 Kawamura, K., Kasukabe, H., and Barrie, L. A.: Source and reaction pathways of  
519 dicarboxylic acids, ketoacids and dicarbonyls in arctic aerosols: One year of observations,  
520 *Atmos. Environ.*, 30, 1709-1722, 1996.

521 Kawamura, K., and Sakaguchi, F.: Molecular distributions of water soluble dicarboxylic acids  
522 in marine aerosols over the Pacific Ocean including tropics, *J. Geophys. Res.*, 104, 3501-  
523 3509, 1999.

524 Kawamura, K., Umemoto, N., Mochida, M., Bertram, T., Howell, S., and Huebert, B. J.:  
525 Water-soluble dicarboxylic acids in the tropospheric aerosols collected over east Asia and  
526 western North Pacific by ACE-Asia C-130 aircraft, *J. Geophys. Res.*, 108, 2003.

527 Kawamura, K., and Yasui, O.: Diurnal changes in the distribution of dicarboxylic acids,  
528 ketocarboxylic acids and dicarbonyls in the urban Tokyo atmosphere, *Atmos. Environ.*, 39,  
529 1945-1960, 2005.

530 Kawamura, K., and Bikkina, S.: A review of dicarboxylic acids and related compounds in  
531 atmospheric aerosols: Molecular distributions, sources and transformation, *Atmos. Res.*, 170,  
532 140-160, 2016.

533 Kleindienst, T. E., Jaoui, M., Lewandowski, M., Offenberg, J. H., Lewis, C. W., Bhave, P. V.,  
534 and Edney, E. O.: Estimates of the contributions of biogenic and anthropogenic hydrocarbons  
535 to secondary organic aerosol at a southeastern US location, *Atmos. Environ.*, 41, 8288-8300,  
536 2007.

537 Kumar, P. P., Broekhuizen, K., and Abbatt, J. P. D.: Organic acids as cloud condensation  
538 nuclei: Laboratory studies of highly soluble and insoluble species, *Atmos. Chem. Phys.*, 3,  
539 509-520, 2003.

540 Lim, H. J., Carlton, A. G., and Turpin, B. J.: Isoprene forms secondary organic aerosol  
541 through cloud processing: Model simulations, *Environ. Sci. Technol.*, 39, 4441-4446, 2005.

542 Lim, Y. B., Tan, Y., Perri, M. J., Seitzinger, S. P., and Turpin, B. J.: Aqueous chemistry and  
543 its role in secondary organic aerosol (SOA) formation, *Atmos. Chem. Phys.*, 10, 10521-  
544 10539, 2010.

545 Lim, Y. B., Tan, Y., and Turpin, B. J.: Chemical insights, explicit chemistry, and yields of  
546 secondary organic aerosol from OH radical oxidation of methylglyoxal and glyoxal in the  
547 aqueous phase, *Atmos. Chem. Phys.*, 13, 8651-8667, 2013.

548 Liu, D., Li, J., Zhang, Y., Xu, Y., Liu, X., Ding, P., Shen, C., Chen, Y., Tian, C., and Zhang,  
549 G.: The use of levoglucosan and radiocarbon for source apportionment of PM<sub>2.5</sub> carbonaceous  
550 aerosols at a background site in East China, *Environ. Sci. Technol.*, 47, 10454-10461, 2013.

551 Muller, C., Iinuma, Y., Boge, O., and Herrmann, H.: Applications of CE-ESI-MS/MS  
552 analysis to structural elucidation of methylenecyclohexane ozonolysis products in the particle  
553 phase, *Electrophoresis*, 28, 1364-1370, 2007.

554 Myriokefalitakis, S., Tsigaridis, K., Mihalopoulos, N., Sciare, J., Nenes, A., Kawamura, K.,  
555 Segers, A., and Kanakidou, M.: In-cloud oxalate formation in the global troposphere: a 3-D  
556 modeling study, *Atmos. Chem. Phys.*, 11, 5761-5782, 2011.

557 Narukawa, M., Kawamura, K., Takeuchi, N., and Nakajima, T.: Distribution of dicarboxylic  
558 acids and carbon isotopic compositions in aerosols from 1997 Indonesian forest fires,  
559 *Geophys. Res. Lett.*, 26, 3101-3104, 1999.

560 Noziere, B., Kalberer, M., Claeys, M., Allan, J., D'Anna, B., Decesari, S., Finessi, E., Glasius,  
561 M., Grgic, I., Hamilton, J. F., Hoffmann, T., Iinuma, Y., Jaoui, M., Kahnt, A., Kampf, C. J.,  
562 Kourtchev, I., Maenhaut, W., Marsden, N., Saarikoski, S., Schnelle-Kreis, J., Surratt, J. D.,  
563 Szidat, S., Szmigielski, R., and Wisthaler, A.: The molecular identification of organic  
564 compounds in the atmosphere: state of the art and challenges, *Chem Rev*, 115, 3919-3983,  
565 2015.

566 Pavuluri, C. M., Kawamura, K., Mihalopoulos, N., and Swaminathan, T.: Laboratory  
567 photochemical processing of aqueous aerosols: formation and degradation of dicarboxylic  
568 acids, oxocarboxylic acids and  $\alpha$ -dicarbonyls, *Atmos. Chem. Phys.*, 15, 7999-8012, 2015.

569 Prabhakar, G., Ervens, B., Wang, Z., Maudlin, L., Coggon, M., Jonsson, H., Seinfeld, J., and  
570 Sorooshian, A.: Sources of nitrate in stratocumulus cloud water: Airborne measurements  
571 during the 2011 E-PEACE and 2013 NiCE studies, *Atmos. Environ.*, 97, 166-173, 2014.

572 Rogge, W. F., Hildemann, L. M., Mazurek, M. A., Cass, G. R., and Simonelt, B. R. T.:  
573 Sources of Fine Organic Aerosol .1. Charbroilers and Meat Cooking Operations, *Environ.*  
574 *Sci. Technol.*, 25, 1112-1125, 1991.

575 Sempere, R., and Kawamura, K.: Low molecular weight dicarboxylic acids and related polar  
576 compounds in the remote marine rain samples collected from western Pacific, *Atmos.*  
577 *Environ.*, 30, 1609-1619, 1996.

578 Shen, L., and Wang, Y.: Changes in tropospheric ozone levels over the Three Representative  
579 Regions of China observed from space by the Tropospheric Emission Spectrometer (TES),  
580 2005–2010, *Chin. Sci. Bull.*, 57, 2865-2871, 2012.

581 Sorooshian, A., Varutbangkul, V., Brechtel, F. J., Ervens, B., Feingold, G., Bahreini, R.,  
582 Murphy, S. M., Holloway, J. S., Atlas, E. L., Buzorius, G., Jonsson, H., Flagan, R. C., and  
583 Seinfeld, J. H.: Oxalic acid in clear and cloudy atmospheres: Analysis of data from



584 International Consortium for Atmospheric Research on Transport and Transformation 2004,  
585 J. Geophys. Res., 111, D23s45, 2006.

586 Sorooshian, A., Lu, M.-L., Brechtel, F. J., Jonsson, H., Feingold, G., Flagan, R. C., and  
587 Seinfeld, J. H.: On the source of organic acid aerosol layers above clouds, Environ. Sci.  
588 Technol., 41, 4647-4654, 2007a.

589 Sorooshian, A., Ng, N. L., Chan, A. W., Feingold, G., Flagan, R. C., and Seinfeld, J. H.:  
590 Particulate organic acids and overall water - soluble aerosol composition measurements from  
591 the 2006 Gulf of Mexico Atmospheric Composition and Climate Study (GoMACCS), Journal  
592 of Geophysical Research: Atmospheres (1984–2012), 112, 2007b.

593 Sorooshian, A., Csavina, J., Shingler, T., Dey, S., Brechtel, F. J., Sáez, A. E., and Betterton,  
594 E. A.: Hygroscopic and chemical properties of aerosols collected near a copper smelter:  
595 implications for public and environmental health, Environ. Sci. Technol., 46, 9473-9480,  
596 2012.

597 Sorooshian, A., Wang, Z., Coggon, M. M., Jonsson, H. H., and Ervens, B.: Observations of  
598 Sharp Oxalate Reductions in Stratocumulus Clouds at Variable Altitudes: Organic Acid and  
599 Metal Measurements During the 2011 E-PEACE Campaign, Environ. Sci. Technol., 47,  
600 7747-7756, 2013.

601 Sorooshian, A., Crosbie, E., Maudlin, L. C., Youn, J. S., Wang, Z., Shingler, T., Ortega, A.  
602 M., Hersey, S., and Woods, R. K.: Surface and airborne measurements of organosulfur and  
603 methanesulfonate over the western United States and coastal areas, J. Geophys. Res., 120,  
604 8535-8548, 2015.

605 Su, M., Lin, Y., Fan, X., Peng, L., and Zhao, C.: Impacts of global emissions of CO, NO<sub>x</sub>,  
606 and CH<sub>4</sub> on China tropospheric hydroxyl free radicals, Adv. Atmos. Sci., 29, 838-854, 2012.

607 Surratt, J. D., Murphy, S. M., Kroll, J. H., Ng, N. L., Hildebrandt, L., Sorooshian, A.,  
608 Szmigielski, R., Vermeylen, R., Maenhaut, W., Claeys, M., Flagan, R. C., and Seinfeld, J. H.:  
609 Chemical composition of secondary organic aerosol formed from the photooxidation of  
610 isoprene, J. Phys. Chem. A, 110, 9665-9690, 2006.

611 Talbot, R. W., Vijgen, A. S., and Harriss, R. C.: Soluble Species in the Arctic Summer  
612 Troposphere - Acidic Gases, Aerosols, and Precipitation, J. Geophys. Res., 97, 16531-16543,  
613 1992.

614 Tan, Y., Perri, M. J., Seitzinger, S. P., and Turpin, B. J.: Effects of Precursor Concentration  
615 and Acidic Sulfate in Aqueous Glyoxal–OH Radical Oxidation and Implications for  
616 Secondary Organic Aerosol, Environ. Sci. Technol., 43, 8105-8112, 2009.

617 Wang, G., Niu, S., Liu, C., and Wang, L.: Identification of dicarboxylic acids and aldehydes  
618 of PM<sub>10</sub> and PM<sub>2.5</sub> aerosols in Nanjing, China, Atmos. Environ., 36, 1941-1950, 2002.

619 Wang, G. H., Kawamura, K., Hatakeyama, S., Takami, A., Li, H., and Wang, W.: Aircraft  
620 measurement of organic aerosols over China, *Environ. Sci. Technol.*, 41, 3115-3120, 2007.

621 Wang, W., Kourtchev, I., Graham, B., Cafmeyer, J., Maenhaut, W., and Claeys, M.:  
622 Characterization of oxygenated derivatives of isoprene related to 2-methyltetrols in  
623 Amazonian aerosols using trimethylsilylation and gas chromatography/ion trap mass  
624 spectrometry, *Rapid Commun. Mass Spectrom.*, 19, 1343-1351, 2005.

625 Wonaschuetz, A., Sorooshian, A., Ervens, B., Chuang, P. Y., Feingold, G., Murphy, S. M.,  
626 Gouw, J., Warneke, C., and Jonsson, H. H.: Aerosol and gas re - distribution by shallow  
627 cumulus clouds: An investigation using airborne measurements, *J. Geophys. Res.*, 117, 2012.

628 Yu, J. Z., Huang, X. F., Xu, J. H., and Hu, M.: When aerosol sulfate goes up, so does oxalate:  
629 Implication for the formation mechanisms of oxalate, *Environ. Sci. Technol.*, 39, 128-133,  
630 2005.

631 Zhang, Q., Jimenez, J. L., Canagaratna, M. R., Allan, J. D., Coe, H., Ulbrich, I., Alfarra, M.  
632 R., Takami, A., Middlebrook, A. M., Sun, Y. L., Dzepina, K., Dunlea, E., Docherty, K.,  
633 DeCarlo, P. F., Salcedo, D., Onasch, T., Jayne, J. T., Miyoshi, T., Shimono, A., Hatakeyama,  
634 S., Takegawa, N., Kondo, Y., Schneider, J., Drewnick, F., Borrmann, S., Weimer, S.,  
635 Demerjian, K., Williams, P., Bower, K., Bahreini, R., Cottrell, L., Griffin, R. J., Rautiainen,  
636 J., Sun, J. Y., Zhang, Y. M., and Worsnop, D. R.: Ubiquity and dominance of oxygenated  
637 species in organic aerosols in anthropogenically-influenced Northern Hemisphere  
638 midlatitudes, *Geophys. Res. Lett.*, 34, L13801, 2007.

639 Zhang, Y.-L., Liu, J.-W., Salazar, G. A., Li, J., Zotter, P., Zhang, G., Shen, R.-r., Schäfer, K.,  
640 Schnelle-Kreis, J., Prévôt, A. S. H., and Szidat, S.: Micro-scale ( $\mu\text{g}$ ) radiocarbon analysis of  
641 water-soluble organic carbon in aerosol samples, *Atmos. Environ.*, 97, 1-5, 2014.

642 Zhang, Y.-L., and Cao, F.: Fine particulate matter (PM<sub>2.5</sub>) in China at a city level, *Scientific*  
643 *Reports*, 5, 14884, 2015.

644 Zhang, Y. L., Huang, R. J., El Haddad, I., Ho, K. F., Cao, J. J., Han, Y., Zotter, P., Bozzetti,  
645 C., Daellenbach, K. R., Canonaco, F., Slowik, J. G., Salazar, G., Schwikowski, M., Schnelle-  
646 Kreis, J., Abbaszade, G., Zimmermann, R., Baltensperger, U., Prévôt, A. S. H., and Szidat, S.:  
647 Fossil vs. non-fossil sources of fine carbonaceous aerosols in four Chinese cities during the  
648 extreme winter haze episode of 2013, *Atmos. Chem. Phys.*, 15, 1299-1312, 2015a.

649 Zhang, Y. L., Schnelle-Kreis, J., Abbaszade, G., Zimmermann, R., Zotter, P., Shen, R. R.,  
650 Schafer, K., Shao, L., Prevot, A. S., and Szidat, S.: Source Apportionment of Elemental  
651 Carbon in Beijing, China: Insights from Radiocarbon and Organic Marker Measurements,  
652 *Environ. Sci. Technol.*, 49, 8408-8415, 2015b.

653 Zhang, Y. L., Kawamura, K., Cao, F., and Lee, M.: Stable carbon isotopic compositions of  
654 low - molecular - weight dicarboxylic acids, oxocarboxylic acids,  $\alpha$  - dicarbonyls, and fatty

655 acids: Implications for atmospheric processing of organic aerosols, *J. Geophys. Res.*, 121,  
656 3707-3717, 2016.

657

658 **Table 1.** Average concentrations ( $\text{ng m}^{-3}$ ) and concentration ranges ( $\text{ng m}^{-3}$ ) for straight chain  
659 diacids ( $\text{C}_2\text{--C}_{11}$ ), branched chain diacids ( $\text{iC}_4\text{--iC}_6$ ), unsaturated diacids (M, F and mM),  
660 multifunctional diacids ( $\text{hC}_4$ ,  $\text{kC}_3$  and  $\text{kC}_7$ ), oxoacids ( $\omega\text{C}_2\text{--}\omega\text{C}_4$ ,  $\omega\text{C}_9$ , and Pyr), and  $\alpha$ -  
661 dicarbonyls (Gly and MeGly) of aerosol samples collected by aircraft campaigns over China.

|                                    | 2003 Summer<br>(inland China) |                        | 2004 Spring<br>(inland China) |             | 2002/2003 Winter<br>(coastal China) |             |
|------------------------------------|-------------------------------|------------------------|-------------------------------|-------------|-------------------------------------|-------------|
|                                    | Range                         | Mean (SD) <sup>a</sup> | Range                         | Mean (SD)   | Range                               | Mean (SD)   |
| Oxalic, $\text{C}_2$               | 36.4-401                      | 183 (111)              | 76.5-918                      | 286 (216)   | 13.3-425                            | 92.6 (94.5) |
| Malonic, $\text{C}_3$              | 6.3-131                       | 54 (35)                | 12.2-216                      | 57.5 (47.6) | 1.4-79                              | 15 (17.9)   |
| Succinic, $\text{C}_4$             | 9.4-277                       | 117 (68.2)             | 16-319                        | 69.1 (69.9) | 2.3-87.9                            | 21.4 (19.8) |
| Glutaric, $\text{C}_5$             | 20.7-289                      | 159 (79.1)             | 6.5-73.8                      | 18.1 (16.3) | 0.9-26.1                            | 9.7 (7.3)   |
| Adipic, $\text{C}_6$               | 52.3-135                      | 93.9 (23.2)            | 5.7-69                        | 19.4 (18.1) | 3.7-34.5                            | 13.4 (8.1)  |
| Pimelic, $\text{C}_7$              | 0-2.5                         | 0.8 (0.7)              | n.d.-8.1                      | 1.7 (2)     | 0.3-7.5                             | 1.9 (1.7)   |
| Suberic, $\text{C}_8$              | n.d. <sup>b</sup>             | n.d.                   | n.d.-2.7                      | 0.2 (0.7)   | n.d.-11                             | 3.2 (2.9)   |
| Azelaic, $\text{C}_9$              | 2-13.5                        | 5.6 (3)                | 2.4-18.2                      | 6.3 (4.3)   | 2.9-20.6                            | 8.5 (4.8)   |
| Sebacic, $\text{C}_{10}$           | 0.3-3.6                       | 1.3 (1.0)              | n.d.-8.4                      | 3.6 (2.5)   | 0-6.9                               | 1.1 (1.8)   |
| Undecanedioic, $\text{C}_{11}$     | 0.8-4.3                       | 2.1 (0.9)              | n.d.-4.3                      | 1.5 (1.3)   | n.d.                                | n.d.        |
| Methylmalonic, $\text{iC}_4$       | 1.2-5.9                       | 3.7 (1.7)              | 1.1-12.5                      | 4.9 (3)     | 0-3.9                               | 0.9 (0.9)   |
| Methylsuccinic, $\text{iC}_5$      | 0.6-10.8                      | 4.4 (3.1)              | 1.3-27.5                      | 5.9 (6.1)   | 0.7-23.2                            | 5.9 (5.8)   |
| Methylglutaric, $\text{iC}_6$      | n.d.-1.3                      | 0.4 (0.4)              | 0.4-5.9                       | 1.2 (1.3)   | n.d.-2.8                            | 0.7 (0.8)   |
| Maleic, M                          | 1.8-12.5                      | 6.5 (3.6)              | 3.3-22.3                      | 9.4 (5)     | 1.6-11.1                            | 5.7 (2.9)   |
| Fumaric, F                         | 0.1-3.9                       | 1.7 (1.1)              | 0.5-8.4                       | 3.0 (2.1)   | 0.1-6.2                             | 1.5 (1.5)   |
| Methylmaleic, mM                   | 2.3-15.1                      | 6.3 (3.6)              | 2.2-18.0                      | 7.4 (3.8)   | 1.3-8.2                             | 4 (2)       |
| Hydroxysuccinic, $\text{hC}_4$     | 1.7-12.5                      | 5.3 (3.4)              | n.d.-9.3                      | 1.9 (2.2)   | n.d.-13.7                           | 1.9 (3.2)   |
| Ketomalonic, $\text{kC}_3$         | 0.4-9.2                       | 4.2 (2.5)              | n.d.-22.8                     | 5.6 (5.3)   | n.d.-26                             | 5.1 (5.6)   |
| Ketopimelic, $\text{kC}_7$         | 0.4-8.2                       | 3.0 (2.3)              | n.d.-18.7                     | 4.0 (4.5)   | n.d.-3.9                            | 0.6 (0.9)   |
| Total diacids                      | 139-1230                      | 653 (290)              | 148-1780                      | 507 (402)   | 40.4-757                            | 193 (164)   |
| n.s. $\text{C}_2\text{--C}_{11}$   | 128-1160                      | 615(272)               | 128-1630                      | 464 (371)   | 31.3-678                            | 167 (149)   |
| Pyruvic acid, Pyr                  | n.d.-9.6                      | 2.9 (3.0)              | 0.1-11.4                      | 2.1 (2.8)   | 0.7-36.5                            | 10 (8.6)    |
| Glyoxylic, $\omega\text{C}_2$      | 8.1-89.6                      | 37.7 (25.2)            | 8.3-146                       | 46.0 (38.0) | 6.7-129                             | 30.6 (28.9) |
| 3-oxopropanoic, $\omega\text{C}_3$ | 0.1-9.7                       | 3.3 (2.4)              | 0.1-1.1                       | 0.5 (0.3)   | n.d.-1.9                            | 0.5 (0.5)   |
| 4-oxobutanoic, $\omega\text{C}_4$  | 0-23.1                        | 8.0 (7.0)              | 6.8-38.9                      | 14.9 (8.5)  | 0.6-35.5                            | 7.5 (8.6)   |
| 9-oxononoic, $\omega\text{C}_9$    | 3.4-36.2                      | 11.6 (8.9)             | 0.3-20.5                      | 5.8 (5.2)   | 0.2-5.5                             | 1.8 (1.4)   |
| Total Keto acid                    | 18.7-131                      | 63.5 (36.0)            | 23.7-178                      | 69.3 (48.5) | 12.2-176                            | 50.0 (36.9) |
| Glyoxal, Gly                       | 0.7-14.8                      | 4.0 (3.6)              | 0.2-9.5                       | 2.3 (2.5)   | 0.6-23                              | 4.3 (5.1)   |
| Methylglyoxal, MeGly               | 0.6-28.2                      | 10.8 (7.7)             | 0.8-27.3                      | 7.4 (8.3)   | 2.5-24.3                            | 7.6 (5.6)   |
| Total dicabonyls                   | 1.3-42.9                      | 14.8 (11.1)            | 1.7-36.8                      | 9.8 (10.7)  | 3.1-47.3                            | 11.8 (10.5) |
| Total                              | 170-1390                      | 731 (329)              | 174-1990                      | 586 (457)   | 68.5-980                            | 255 (209)   |
| Gly/MeGly                          | 0.1-1.2                       | 0.4 (0.2)              | 0.04-1.0                      | 0.4 (0.3)   | 0.2-0.9                             | 0.5 (0.2)   |
| M/F                                | 1.7-13.9                      | 4.9 (2.9)              | 1.1-13.8                      | 4.5 (3.1)   | 1.6-27.4                            | 6.8 (6.2)   |
| $\omega\text{C}_2/\text{C}_2$      | 0.1-0.2                       | 0.2 (0.03)             | 0.1-0.3                       | 0.2 (0.04)  | 0.2-0.8                             | 0.4 (0.1)   |
| $\text{C}_2/\text{C}_4$            | 0.6-6.7                       | 2.0 (1.6)              | 2.9-5.9                       | 4.6 (0.9)   | 2.8-13.5                            | 4.6 (2.3)   |
| $\text{C}_3/\text{C}_4$            | 0.2-1.9                       | 0.5 (0.42)             | 0.7-1.1                       | 0.9 (0.1)   | 0.4-1.7                             | 0.7 (0.3)   |
| $\text{C}_5/\text{C}_9$            | 5.2-64.6                      | 31.3 (15.6)            | 1.6-4.3                       | 2.8 (0.7)   | 0.1-2.7                             | 1.1 (0.6)   |
| $\text{C}_6/\text{C}_9$            | 10.0-41.0                     | 19.8 (7.21)            | 1.3-4.6                       | 2.8 (0.9)   | 0.5-2.8                             | 1.6 (0.6)   |

662 <sup>a</sup>SD denotes standard deviation ( $1\sigma$ ); <sup>b</sup>n.d. denotes not detected.

663 **Table 2.** Correlation coefficients ( $r^2$ ) among oxalic acid (C<sub>2</sub>), pyruvic acid (Pyr), glyoxylic acid  
 664 ( $\omega$ C<sub>2</sub>), glyoxal (Gly) and methylglyoxal (MeGly) detected in aerosol samples from aircraft  
 665 campaigns during summer 2003 ( $n=14$ ), spring 2004 ( $n=16$ ) and winter 2002/2003 ( $n=18$ ) over  
 666 China. See Table 1 for abbreviations.

| <b>Summer 2003</b>      |                |      |                         |      |       |
|-------------------------|----------------|------|-------------------------|------|-------|
|                         | C <sub>2</sub> | Pyr  | $\omega$ C <sub>2</sub> | Gly  | MeGly |
| C <sub>2</sub>          | 1.00           |      |                         |      |       |
| Pyr                     | 0.89           | 1.00 |                         |      |       |
| $\omega$ C <sub>2</sub> | 0.97           | 0.95 | 1.00                    |      |       |
| Gly                     | 0.75           | 0.86 | 0.85                    | 1.00 |       |
| MeGly                   | 0.91           | 0.97 | 0.97                    | 0.90 | 1.00  |

| <b>Spring 2004</b>      |                |      |                         |      |       |
|-------------------------|----------------|------|-------------------------|------|-------|
|                         | C <sub>2</sub> | Pyr  | $\omega$ C <sub>2</sub> | Gly  | MeGly |
| C <sub>2</sub>          | 1.00           |      |                         |      |       |
| Pyr                     | 0.95           | 1.00 |                         |      |       |
| $\omega$ C <sub>2</sub> | 0.97           | 0.93 | 1.00                    |      |       |
| Gly                     | 0.96           | 0.95 | 0.97                    | 1.00 |       |
| MeGly                   | 0.93           | 0.92 | 0.94                    | 0.93 | 1.00  |

| <b>Winter 2002/2003</b> |                |      |                         |      |       |
|-------------------------|----------------|------|-------------------------|------|-------|
|                         | C <sub>2</sub> | Pyr  | $\omega$ C <sub>2</sub> | Gly  | MeGly |
| C <sub>2</sub>          | 1.00           |      |                         |      |       |
| Pyr                     | 0.70           | 1.00 |                         |      |       |
| $\omega$ C <sub>2</sub> | 0.98           | 0.70 | 1.00                    |      |       |
| Gly                     | 0.92           | 0.69 | 0.90                    | 1.00 |       |
| MeGly                   | 0.85           | 0.63 | 0.83                    | 0.94 | 1.00  |

667

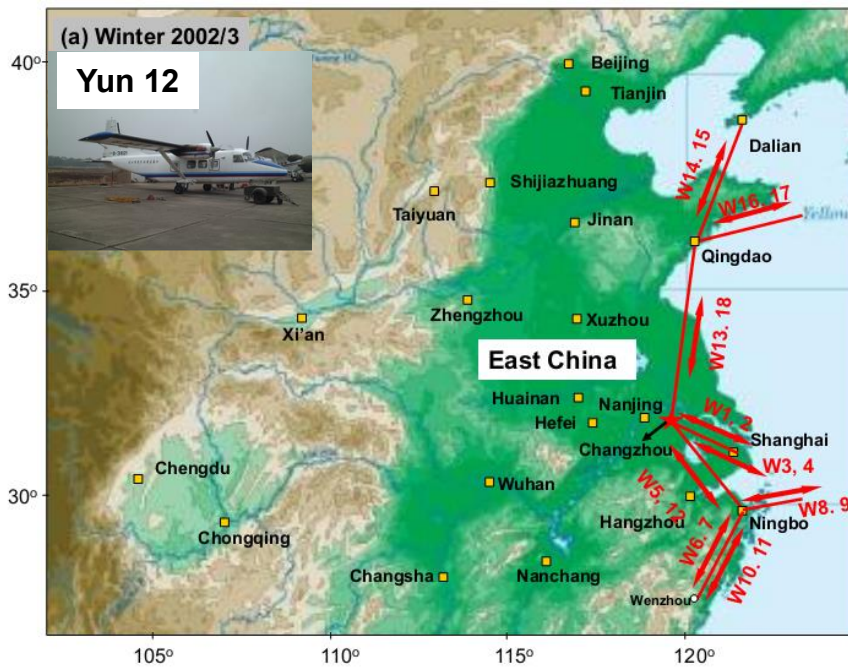

668

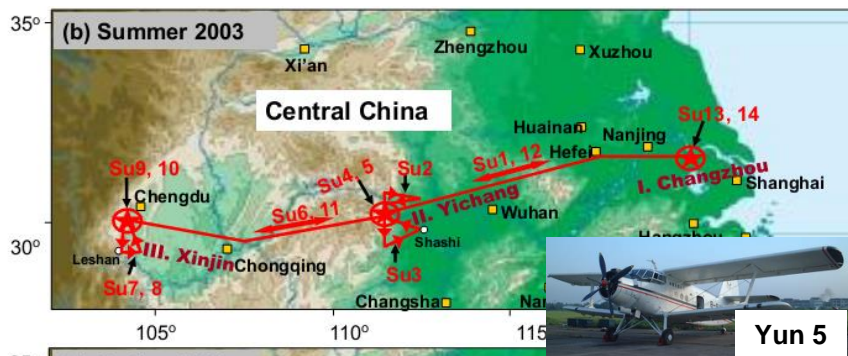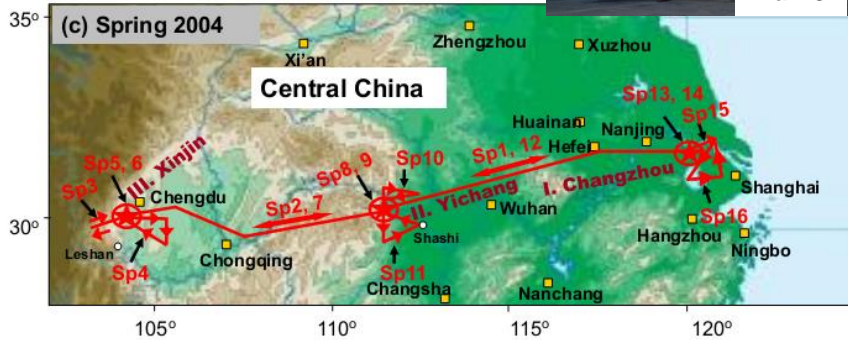

669

670 **Figure 1.** Tracks of research flights during aircraft measurements over China during (a) winter  
 671 2002, (b) summer 2003 and (c) spring 2004. The detailed sampling information with flight No.  
 672 is listed in the Supplementary Table S1. The maps with the flight tracks were drawn by the  
 673 software of PowerPoint 2010, <https://products.office.com/>.

674

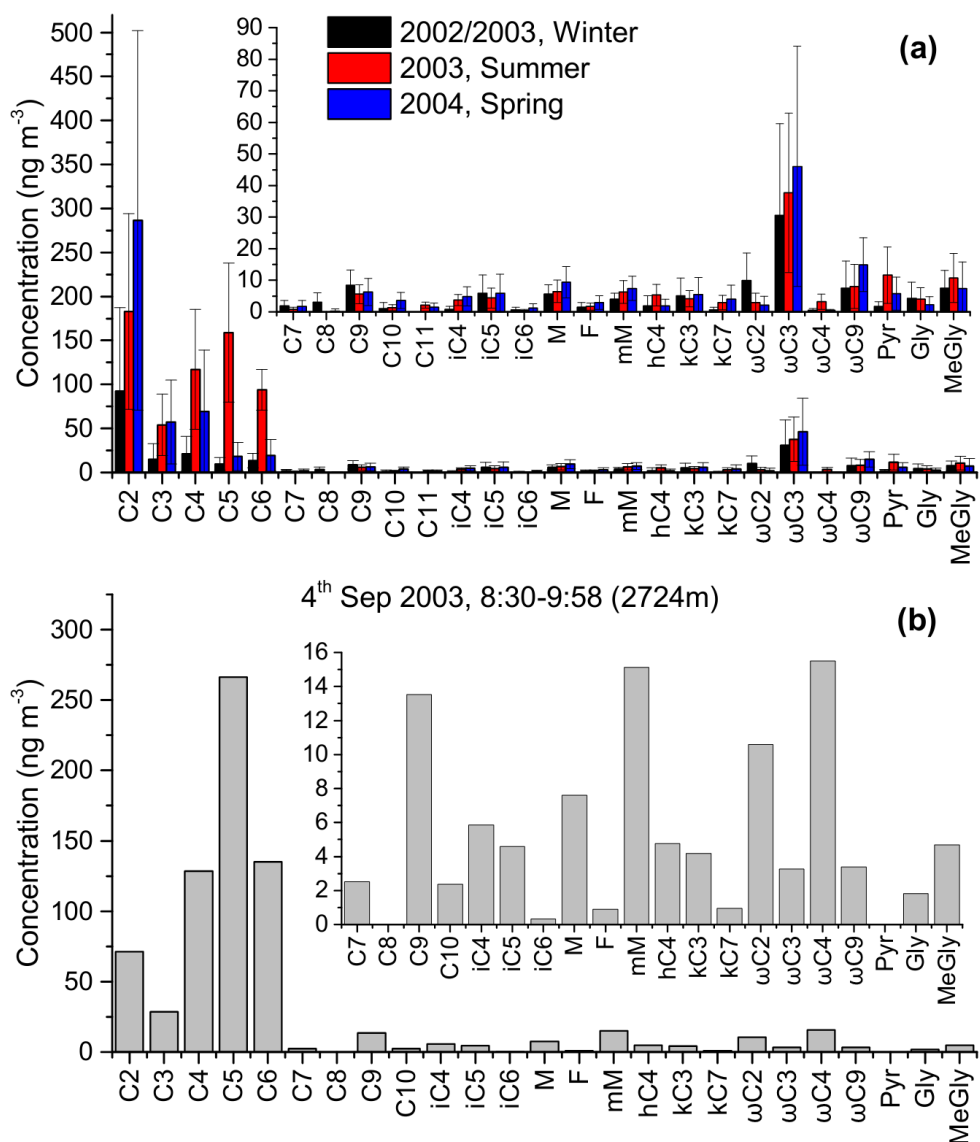

675

676 **Figure 2.** Molecular distributions of straight chain diacids (C<sub>2</sub>–C<sub>11</sub>), branched chain diacids  
 677 (iC<sub>4</sub>–iC<sub>6</sub>), unsaturated diacids (M, F and mM), multifunctional diacids (hC<sub>4</sub>, kC<sub>3</sub> and kC<sub>7</sub>),  
 678 ketoacids (ωC<sub>2</sub>–ωC<sub>4</sub>, ωC<sub>9</sub>, and Pyr), and α-dicarbonyls (Gly and MeGly) in aircraft  
 679 measurement over China; (a) averaged concentrations with bars of standard deviation during  
 680 winter 2002/2003, summer 2003 and spring 2004; (b) molecular distributions of the measured  
 681 compounds in the sample collected on 4<sup>th</sup> Sep 2003. See Table 1 for abbreviations.

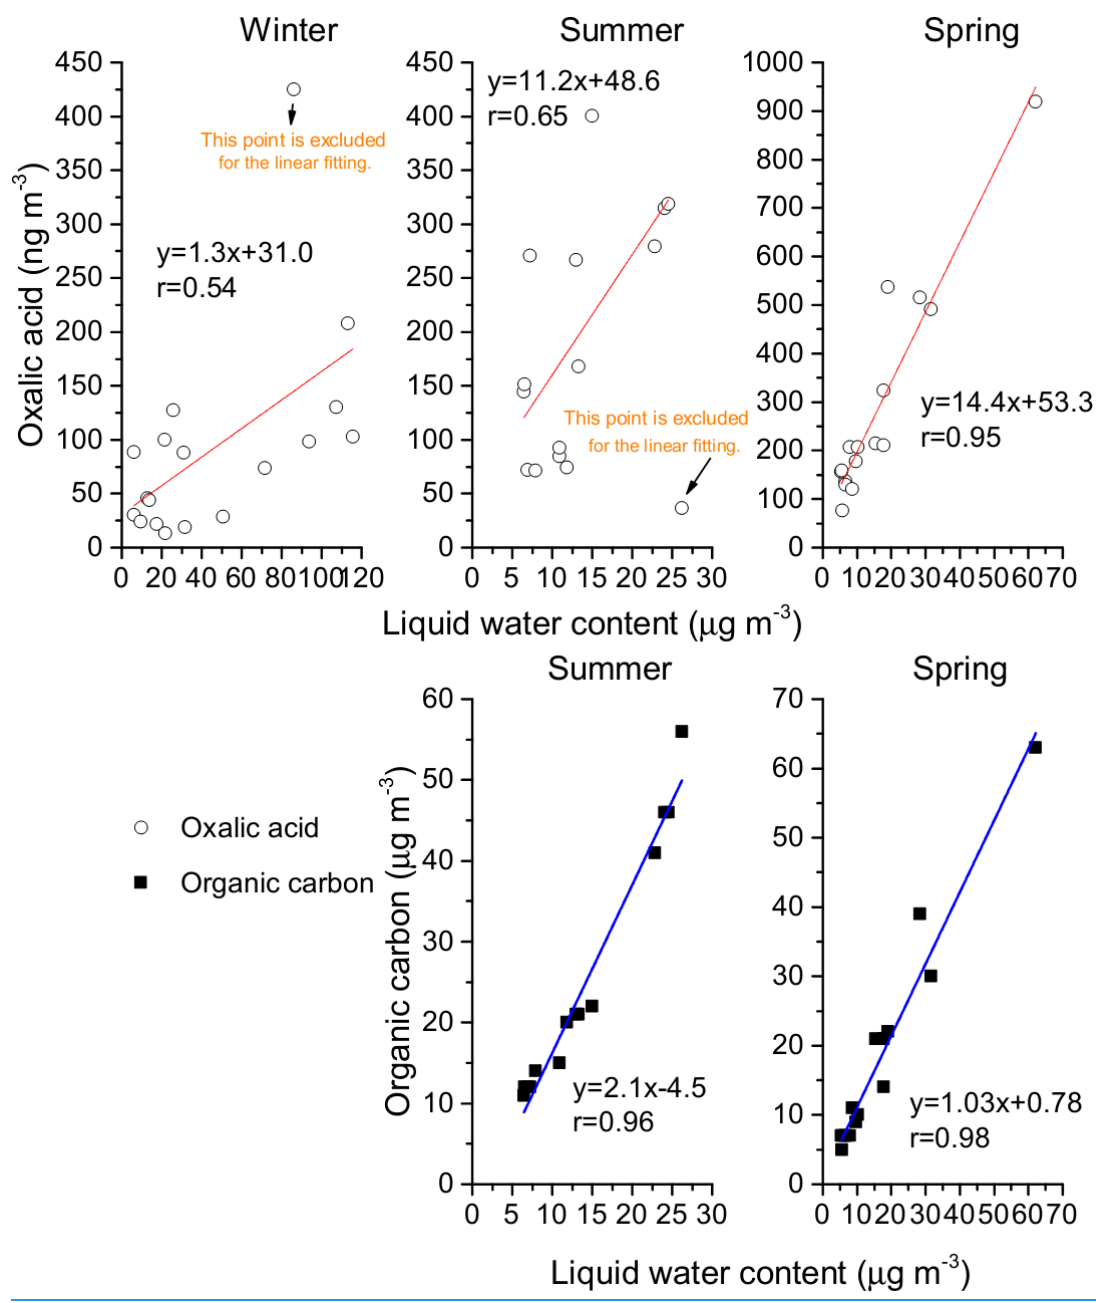

682

683 [Figure 3. The linear fitting of the predicted liquid water content with organic carbon \(OC\) and](#)  
 684 [oxalic acid aerosols during winter, summer, and spring aircraft measurements over China.](#)

685



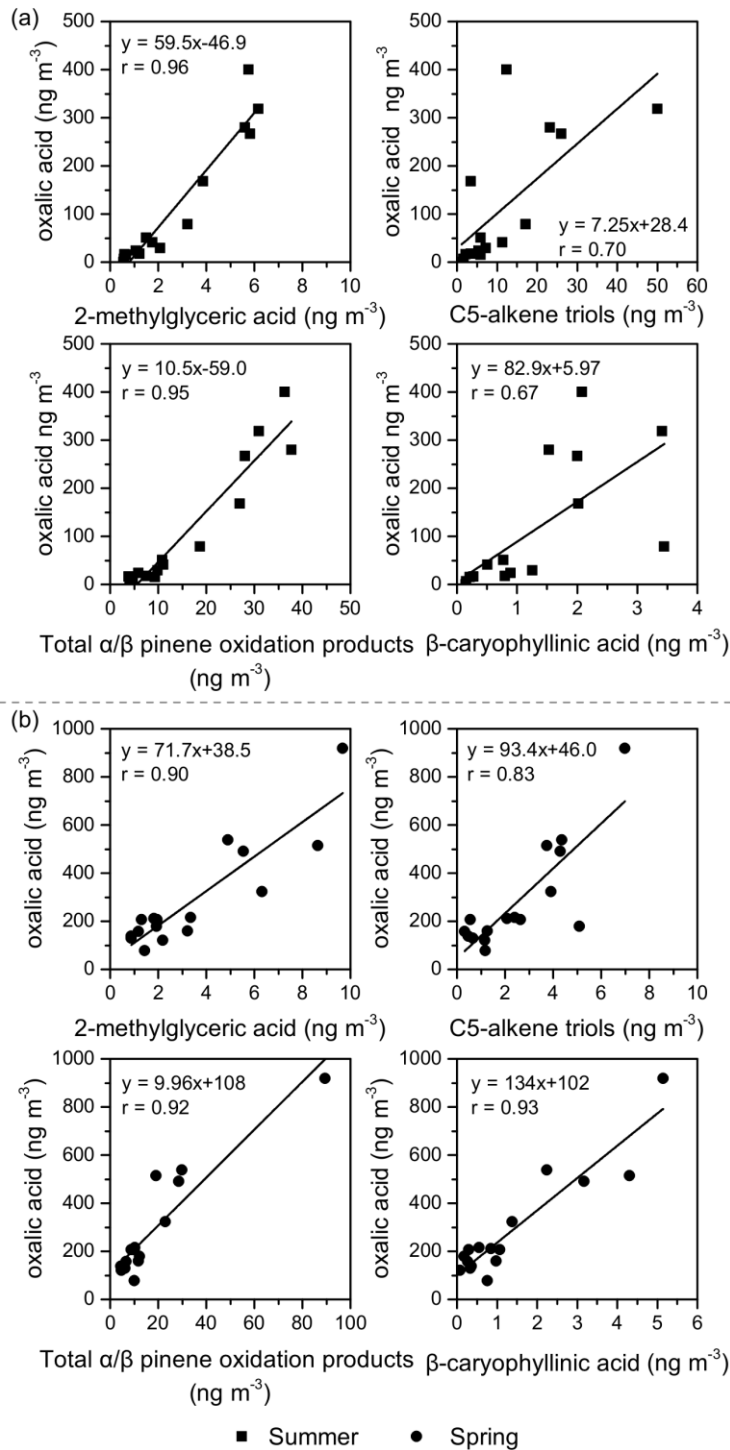

686

687 **Figure 43.** Linear relationship of the concentrations of oxalic acid with the detected tracer  
 688 compounds for secondary organic aerosols (SOA) such as isoprene SOA tracers such as 2-  
 689 methylglyceric acid and C5-alkene triols (sub-total of cis-2-methyl-1,3,4-trihydroxy-1-butene,  
 690 3-methyl-2,3,4-trihydroxy-1-butene, trans-2-methyl-1,3,4-trihydroxy-1-butene),  $\alpha/\beta$ -pinene  
 691 SOA tracers (subtotal of 3-hydroxyglutaric acid, pinonic acid, pinic acid, 3-methyl-1,2,3-  
 692 butanetricarboxylic acid), and  $\beta$ -caryophyllene SOA tracer (i.e.,  $\beta$ -caryophyllinic acid) from  
 693 aircraft measurements over China during (a) summer and (b) spring.

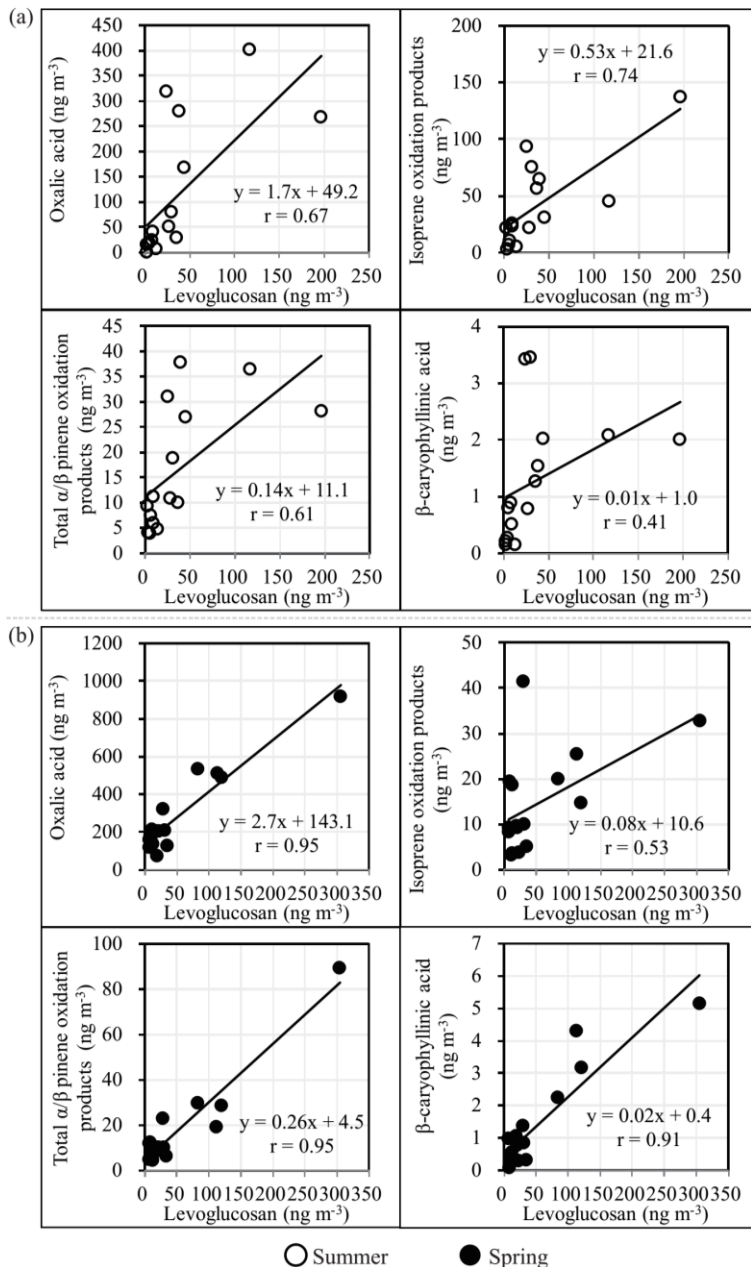

694

695 [Figure 5. Linear relationship for the concentrations of levoglucosan with oxalic acid, isoprene](#)  
 696 [SOA tracers,  \$\alpha/\beta\$ -pinene SOA tracers and  \$\beta\$ -caryophyllene SOA tracer from the aircraft](#)  
 697 [measurements over China during \(a\) summer and \(b\) spring.](#)

698

699

700

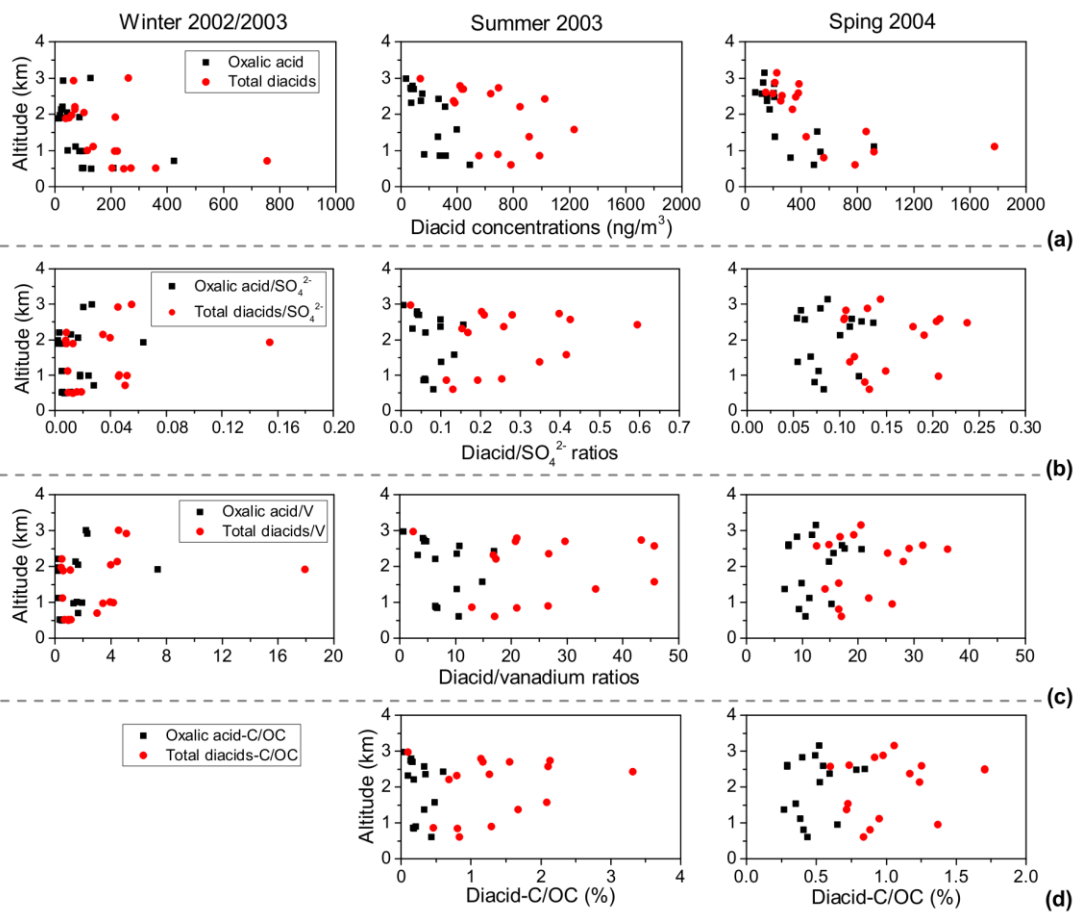

701

702 **Figure 64.** Vertical profiles of (a) concentrations of oxalic acid and total diacids, and their  
 703 relative abundance to (b) sulfate ( $\text{SO}_4^{2-}$ ), (c) vanadium (V), and (d) organic carbon (OC, %) in  
 704 aerosol samples collected during winter 2002 (left), summer 2003 (middle) and spring 2004  
 705 (right) aircraft campaigns over China.

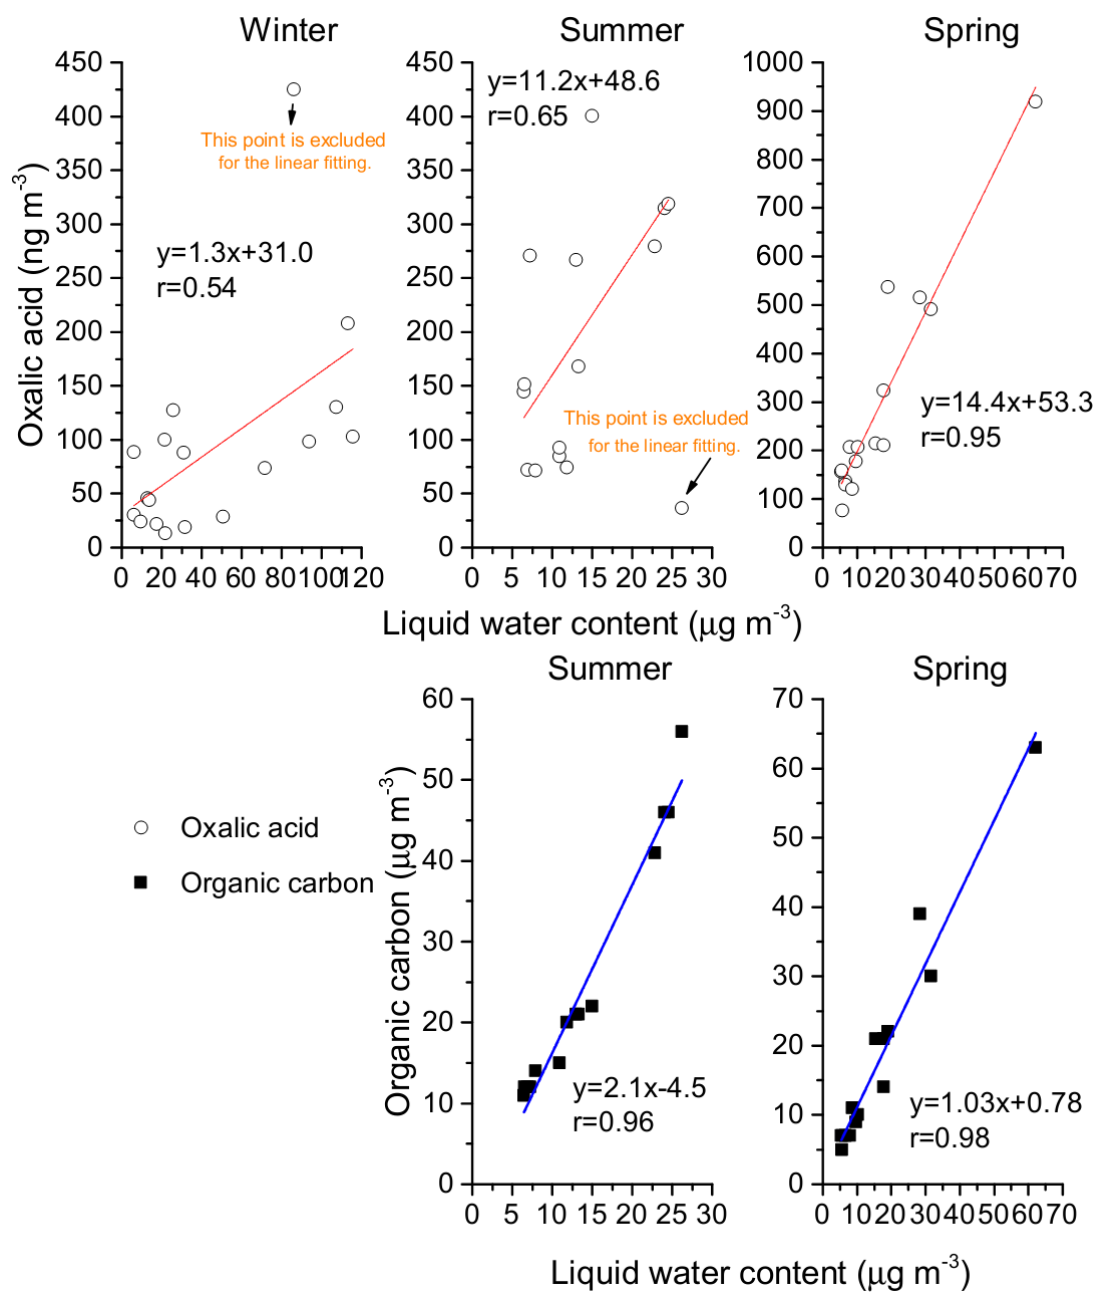

706

707 **Figure 5.** The linear fitting of the predicted liquid water content with organic carbon (OC) and  
 708 oxalic acid aerosols during winter, summer, and spring aircraft measurements over China.
